# Supplementary material for: Requirement of RIZ1 for Cancer Prevention by Methyl-Balanced Diet
Source: PubMed Central journal article supplement (PMC2559864; doi:10.1371/journal.pone.0003390), 2008-10-13
Supplement: pone.0003390.s006.pdf [file pone.0003390.s006.pdf]

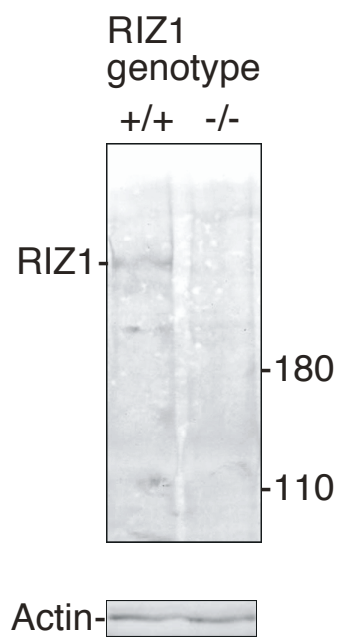

Supplementary Figure 1
