# Supplementary material for: Requirement of RIZ1 for Cancer Prevention by Methyl-Balanced Diet
Source: PubMed Central journal article supplement (PMC2559864; doi:10.1371/journal.pone.0003390), 2008-10-13

# A

## MCF-7 mammary carcinoma cell

| <i>NotI</i> + | G |   |   |   | A |   |   |   | T |   |   |   | C |   |   |   |
|---------------|---|---|---|---|---|---|---|---|---|---|---|---|---|---|---|---|
| <i>MseI</i> + | G | A | T | C | G | A | T | C | G | A | T | C | G | A | T | C |
| 5-AzaC        | - | + | - | + | - | + | - | + | - | + | - | + | - | + | - | + |

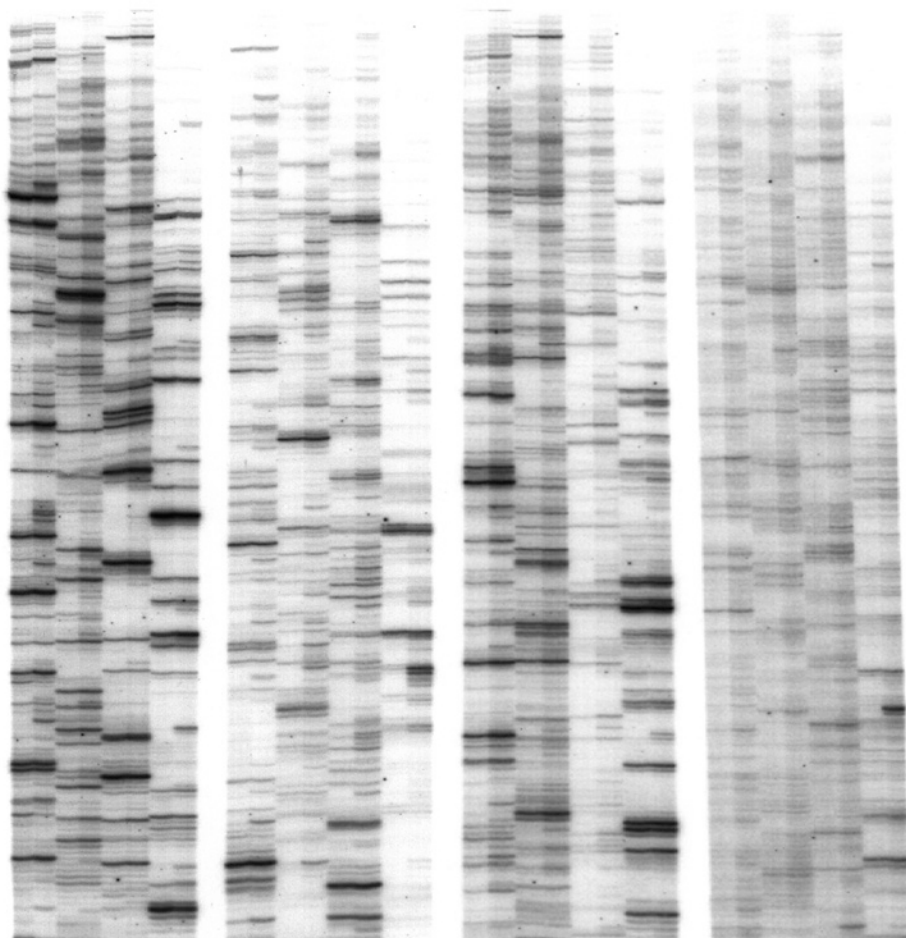

**B**

|               |   |   |   |   |   |   |   |   |   |   |   |   |   |   |   |   |
|---------------|---|---|---|---|---|---|---|---|---|---|---|---|---|---|---|---|
| <i>NotI</i> + | G |   |   |   |   |   |   |   | A |   |   |   |   |   |   |   |
| <i>MseI</i> + | G |   | A |   | T |   | C |   | G |   | A |   | T |   | C |   |
| Tissue        | B | L | B | L | B | L | B | L | B | L | B | L | B | L | B | L |
| Diet          | 1 | 2 | 1 | 2 | 1 | 2 | 1 | 2 | 1 | 2 | 1 | 2 | 1 | 2 | 1 | 2 |

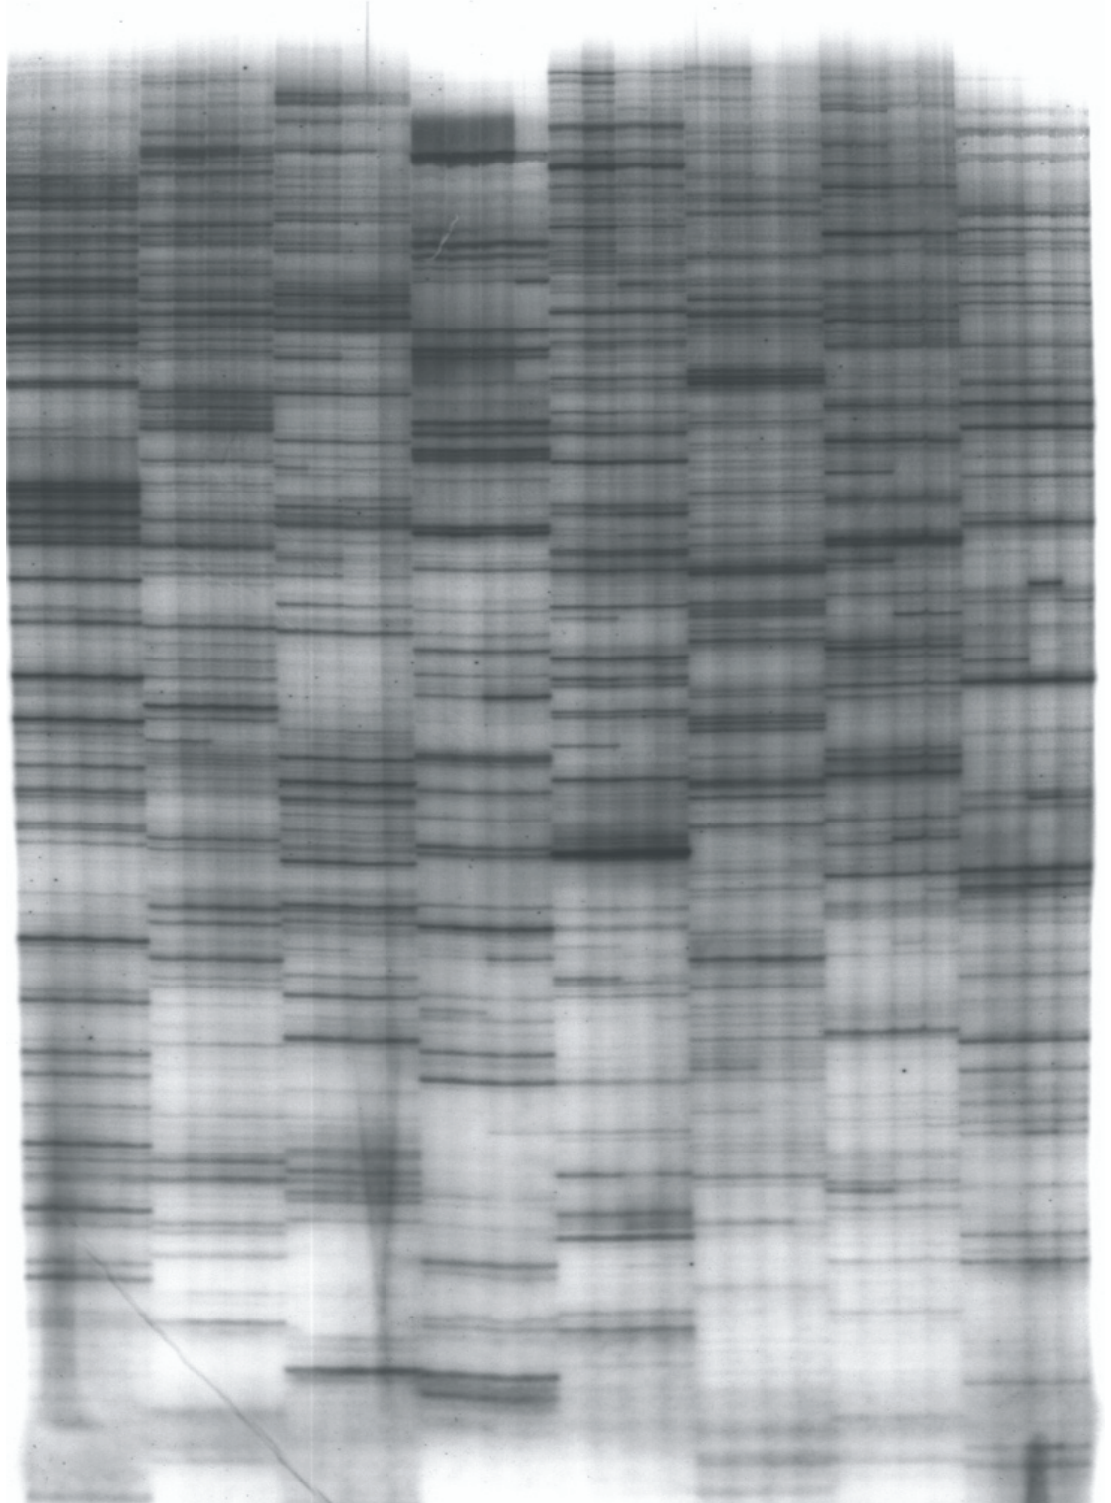

Supplement: pone.0003390.s008.pdf [file pone.0003390.s008.pdf]
