# Supplementary material for: Requirement of RIZ1 for Cancer Prevention by Methyl-Balanced Diet
Source: PLoS One. 2008 Oct 13;3(10):e3390. doi: 10.1371/journal.pone.0003390 (PMC2559864; doi:10.1371/journal.pone.0003390)
Supplement: Table S3 — Genes regulated by diet as revealed by DNA microarray analysis. Wild type mice were fed with either diet 1 or diet 2 for two months before their livers were collected for RNA extraction. Data represent means of 2 animals per subgroup. Only genes showing more than 2 fold changes are listed. (0.85 MB XLS) [file pone.0003390.s003.xls]

## Sheet: Sheet1
Supplementary Table S3
Symbol	Accession	Diet 2	Diet 1	Diet 2/Diet 1
Nupr1	NM_019738.1	442.3	1.3	340.231
Mmp13	NM_008607.1	433.2	1.3	333.231
Ly6d	NM_010742.1	2525.7	12.3	205.341
D17H6S56E-5	NM_033075.2	809.5	4	202.375
Cdc20	NM_023223.1	291	1.5	194
9530018I07Rik		56.8	0.3	189.333
Clecsf12	NM_020008.1	178.2	1.1	162
Gsta1	NM_008181.1	5210.9	38.1	136.769
Ccl4	NM_013652	308.8	2.3	134.261
Cdc2a	NM_007659.2	80.3	0.6	133.833
Ccnb1	NM_172301.2	133.3	1.5	88.8667
Ubd	NM_023137.2	967.2	11	87.9273
Fcgr1	NM_010186.2	58.7	0.7	83.8571
Ddit4l	NM_030143.2	53.5	0.7	76.4286
Myo1f	NM_053214.1	349.4	4.6	75.9565
Csprs	NM_033616.2	99.6	1.5	66.4
Cidec	NM_178373.2	423.8	6.8	62.3235
Asns	NM_012055.1	1098.3	18.2	60.3462
Cd14	NM_009841.2	507.6	8.5	59.7176
Guca2a	NM_008190.1	85.6	1.5	57.0667
Bcl2a1a	NM_009742.2	461.1	8.1	56.9259
Bcl2a1d	NM_007536	809.6	15.1	53.6159
Cib3	XM_356089.1	4150.4	78.6	52.8041
Gpr65	NM_008152.1	105.4	2	52.7
Mrc2	NM_008626	68.2	1.3	52.4615
D17H6S56E-5	NM_033075.2	2376.7	45.9	51.78
LOC327957	XM_282993.1	96.8	1.9	50.9474
Gpnmb	NM_053110	280.6	6	46.7667
Areg	NM_009704.2	114.9	2.5	45.96
Osbpl3	NM_027881.1	878.8	19.9	44.1608
Plcg2	NM_172285.1	132.4	3.3	40.1212
Cd68	NM_009853.1	376.4	10.8	34.8519
BC064033	NM_173375	93	2.8	33.2143
Blnk	NM_008528.3	377.1	11.4	33.0789
BC024955	NM_201352.1	52.9	1.6	33.0625
Uap1l1	XM_130172.4	1653.6	53.4	30.9663
Lcn2	NM_008491.1	9281.5	302.5	30.6826
DXImx50e	NM_207202.1	314.7	10.3	30.5534
Prc1	NM_145150.1	416.3	13.7	30.3869
Cdkn1a	NM_007669.2	550.6	19	28.9789
Slpi	NM_011414.1	249	8.6	28.9535
Gng2	NM_010315.2	110.2	3.9	28.2564
Cd83	NM_009856.1	122.7	4.4	27.8864
Cx3cr1	NM_009987.2	104.8	3.9	26.8718
Lilrb4	NM_013532.1	168	6.4	26.25
Cdkn3	XM_354809.1	436.5	16.7	26.1377
Ncf4	NM_008677.1	236.9	9.1	26.033
Cxcl14	NM_019568.1	211.4	8.4	25.1667
C2ta	NM_007575.1	147.2	6	24.5333
Rmcs1	NM_207105.1	4121.9	170.7	24.147
Serpine2	AK045954	73.8	3.3	22.3636
Cln6	XM_134858.5	158.3	7.1	22.2958
Bcl2a1b	NM_007534	993.2	44.6	22.2691
Samsn1	NM_023380.1	72.3	3.3	21.9091
Gstm3	NM_010359.1	3888.1	180.3	21.5646
Mmp24	NM_010808	84	3.9	21.5385
Calml4	NM_138304.1	704	32.9	21.3982
Gstm3	NM_010359.1	15712.1	736	21.348
Cbr3	NM_173047.2	109.8	5.2	21.1154
H2-Eb1	NM_010382.1	3120.6	148.3	21.0425
LOC386456	XM_359279.1	83	4	20.75
Gp49a	AK089366	303.7	14.7	20.6599
Gus-s	AK002832	64.5	3.2	20.1562
Stmn1	NM_019641	269.6	13.5	19.9704
		237.4	11.9	19.9496
Fgf21	NM_020013.2	1827.8	92.5	19.76
Lgals3	NM_010705.1	4054.1	205.4	19.7376
Pparg	NM_011146.1	89.7	4.6	19.5
B930041F14Rik	NM_178699	618	31.8	19.434
H2-Aa	NM_010378.2	5406.6	283.3	19.0844
S3-12	NM_020568.1	800.8	42.2	18.9763
Sprr1a	NM_009264.1	140.9	7.5	18.7867
Plp2	NM_019755.2	87.9	4.7	18.7021
Cxcl13	NM_018866.1	111.4	6	18.5667
4930539E08Rik	NM_172450.1	75.9	4.1	18.5122
Ear2	NM_007895	437.9	24.2	18.095
Rmcs1	NM_207105.1	6603.2	369.4	17.8755
9930027N05Rik	NM_198405.1	142.5	8	17.8125
Cd207	NM_144943.2	147.4	8.4	17.5476
Igfbp1	NM_008341.2	326.2	19	17.1684
Pik3cg	NM_020272	73.7	4.3	17.1395
9630054F20Rik	NM_173784.3	53	3.1	17.0968
Ii	BC003476	389	22.8	17.0614
Abcc4	XM_139262.2	237.3	14.2	16.7113
Lyzs	NM_017372.2	2359.3	142.1	16.6031
Cyp4f16	NM_024442.1	59	3.6	16.3889
BC051083	NM_181409.2	460.9	28.7	16.0592
Capg	NM_007599	330.7	21	15.7476
Jun	NM_010591.1	396.1	25.5	15.5333
Thy1	NM_009382.2	52.2	3.4	15.3529
Hist1h3i	NM_178207	55.2	3.6	15.3333
Golph2	NM_027307.1	562	36.9	15.2304
Ms4a6d	NM_026835.1	336	22.2	15.1351
Tbxas1	NM_011539	87.6	5.9	14.8475
E030040G24Rik	AK087259	174	11.8	14.7458
Ear1	NM_007894	1546.6	105.5	14.6597
9130019I15Rik	XM_356104	68	4.7	14.4681
Cxcl4	NM_019932.1	186.9	13	14.3769
Copeb	NM_011803	131.8	9.2	14.3261
Cd44	AK045226	409	28.6	14.3007
H2-DMb1	NM_010387.2	400.3	28.1	14.2456
BC032204	NM_153795.1	65.9	4.7	14.0213
LOC218617	XM_122636.2	261.5	18.7	13.984
Cdca2	NM_175384.3	70.1	5.2	13.4808
BC018222	NM_144936.1	221.6	16.5	13.4303
Cdkn1a	NM_007669.2	825.2	61.6	13.3961
Ear2	NM_007895.2	2407.2	180.3	13.3511
H2-Ab1	NM_010379.2	2769.4	208.7	13.2698
Glipr2	NM_027450	77.8	5.9	13.1864
Matn2	AK035102	53.6	4.1	13.0732
S100a11	NM_016740	187.4	14.4	13.0139
Hspb1	NM_013560.1	442.1	34	13.0029
Slc15a3	NM_023044.1	75.3	5.8	12.9828
Gsta2	NM_008182	8615.2	666.2	12.9319
Ear10	NM_053112.1	1171.1	91	12.8692
Ly86	NM_010745.1	281.9	22.2	12.6982
Gsta2	NM_008182.1	12192.9	976.1	12.4914
Arhgef16	XM_149562.4	57.1	4.6	12.413
Cxcl14	NM_019568	87.2	7.1	12.2817
Pparg	NM_011146.1	650.5	53.4	12.1816
Fpr-rs2	NM_008039.1	1027.6	85.1	12.0752
Tes	NM_011570	299	25.4	11.7717
H2-DMa	NM_010386	268.9	22.9	11.7424
2310061N23Rik	NM_029803.1	2132.6	183.1	11.6472
Anxa2	NM_007585.2	10072.4	872.1	11.5496
Dusp8	NM_008748.1	103.4	9.1	11.3626
Unc119	NM_011676.2	62.3	5.5	11.3273
Lgals1	NM_008495.1	1183.5	105.1	11.2607
2700004G04Rik		87.6	7.8	11.2308
Stk6	NM_011497.2	67.9	6.1	11.1311
Oas1g	NM_011852.2	246.3	22.2	11.0946
Dpep2	NM_176913.3	75	6.8	11.0294
Saa3	NM_011315	1013.5	92.9	10.9096
Cd72	NM_007654.1	443.1	41.1	10.781
Mad2l1	NM_019499	101.1	9.4	10.7553
Gsta2	NM_008182.1	7785.1	728.7	10.6835
Gsta1	NM_008181.1	4099.2	390.4	10.5
Klra22	NM_053152.1	75.6	7.2	10.5
Sla	NM_009192	241.5	23.1	10.4545
Ii	NM_010545.2	4085.8	395.3	10.3359
Pilrb	NM_133209.1	92.7	9	10.3
Cd68	NM_009853	2007.4	197.6	10.1589
Ncf2	NM_010877	866.1	86.9	9.96663
Mt2	NM_008630.1	671.8	67.9	9.89396
Tagln2	NM_178598.1	979.1	99.4	9.8501
Il10ra	NM_008348.1	83.5	8.5	9.82353
Niban	NM_022018	54	5.5	9.81818
Il1b	NM_008361	183.1	19	9.63684
Mas1	NM_008552.2	127.4	13.3	9.57895
Pscdbp	NM_139200.2	295.5	30.9	9.56311
E430004N04Rik	NM_178666.3	88.6	9.3	9.52688
Ier3	NM_133662.1	160.6	17.1	9.39181
Kif23	NM_024245	155.9	16.7	9.33533
Fthfsdc1	NM_172308.2	238	25.6	9.29688
Fos	NM_010234.2	134.8	14.5	9.29655
Xcl1	NM_008510.1	76.1	8.2	9.28049
Spink3	NM_009258.2	325.7	35.1	9.2792
Lsp1	NM_019391.1	202.2	22.1	9.14932
Mapre2	NM_153058.2	56.3	6.2	9.08065
LOC226691	XM_129595.2	469.8	52.3	8.98279
Oxct1	NM_024188.3	200.1	22.4	8.93304
BC042423		74.1	8.3	8.92771
Oas1g	NM_011852.2	814.7	92.5	8.80757
Hist1h4a	NM_178192.1	103	11.7	8.80342
Bex2	NM_009749	105.7	12.1	8.73554
LOC240672	XM_140740.3	277.1	31.8	8.71384
Rac2	NM_009008.2	194.4	22.6	8.60177
LOC381276	XM_355218.1	75.5	9	8.38889
Rgs10	NM_026418.1	207.3	25	8.292
Tlr2	NM_011905.2	759.3	92	8.25326
Csf1r	NM_007779.1	113.4	13.9	8.15827
		87.1	10.7	8.14019
Psat1	XM_129211.2	79.7	9.8	8.13265
Cklfsf7	NM_133978.1	84.4	10.4	8.11538
Btk	NM_013482.1	102.8	12.7	8.09449
Plekhh1	XM_126961.4	83	10.3	8.05825
Ccl6	NM_009139.1	127.9	15.9	8.04403
2210010C17Rik	XM_133228.2	122.9	15.4	7.98052
AY078069	NM_172142.1	70.6	9	7.84444
Fer1l3	XM_283556	484	62.1	7.79388
Evl	NM_007965.2	160.2	20.6	7.7767
S100a8	NM_013650.1	229.4	29.5	7.77627
Gabrb3	NM_008071	127.2	16.4	7.7561
Treh	NM_021481.1	783.1	101	7.75347
Birc5	NM_009689.1	188.8	24.5	7.70612
Abhd2	NM_018811.4	98.1	12.9	7.60465
Cdca5	NM_026410.1	60.7	8	7.5875
Npn3	NM_029688.2	727.5	97.1	7.49228
Epb4.1l1	XM_487678	107.7	14.4	7.47917
Ptpn9	NM_019651	142.2	19.1	7.44503
Mogat1	NM_026713.1	313.4	42.1	7.44418
Pla2g7	NM_013737.2	158.8	21.4	7.42056
Nme5	NM_080637	54.8	7.5	7.30667
Pdgfb	NM_011057.2	103.6	14.2	7.29577
Coro1a	NM_009898.2	1051.4	144.5	7.27612
Prom1	NM_008935.1	68.7	9.5	7.23158
BC051083	NM_181409.2	121.3	16.8	7.22024
Tgfb1	NM_011577.1	96.6	13.5	7.15556
AI449441	NM_172453.1	128.4	18	7.13333
2410004L22Rik	NM_029621.1	162.5	22.8	7.12719
Cklfsf7	NM_133978.1	165.2	23.4	7.05983
Ly6c	NM_010741	137.2	19.5	7.0359
9230112O05Rik	NM_173347.2	82.3	11.7	7.03419
Tlr13	NM_205820.1	139.6	19.9	7.01508
Nusap1	NM_133851.1	124	17.7	7.00565
Was	NM_009515.1	170.2	24.3	7.00412
Ccnd1	NM_007631.1	1278.1	182.7	6.99562
Icsbp1	NM_008320.2	287.3	41.1	6.99027
Anxa5	NM_009673.1	6866.4	982.4	6.98941
Fcrl3	NM_144559.1	1394	200.8	6.94223
Cdca3	NM_013538.3	685.3	99.4	6.89437
7330423F06Rik		90.5	13.2	6.85606
Pscd4	NM_028195	2034	297.1	6.84618
Hemp1	NM_153505.2	566.2	82.8	6.83816
2610318C08Rik	XM_149213.1	150.6	22.1	6.81448
F830002E14Rik	AK089567	7836.1	1151.5	6.80512
C1qb	NM_009777.1	2234.4	331.5	6.74027
Coro1a	NM_009898.2	116.9	17.4	6.71839
LOC381484	XM_355437.1	171.5	25.6	6.69922
AI840980	NM_153119.2	210.7	31.6	6.66772
2810052M02Rik	NM_023320.1	56	8.4	6.66667
2900076A13Rik		943.1	141.5	6.66502
Lpl	NM_008509.1	3825.3	575.1	6.65154
Cd84	NM_013489.1	159.5	24	6.64583
Selpl	NM_009151.2	701.8	105.9	6.62701
Nav1	NM_173437	72.1	10.9	6.61468
2010003K11Rik	XM_129092.1	1263.8	191.9	6.58572
Aif1	NM_019467.2	307.6	46.8	6.57265
2310057H16Rik	NM_026473.2	1280.6	196.4	6.52037
Itga6	NM_008397	114.1	17.5	6.52
Evi2a	NM_010161.1	201.8	31.1	6.48875
H2-DMb2	NM_010388	472.7	73.1	6.46648
Tnfaip3	NM_009397.2	106.4	16.5	6.44848
Npn3	NM_029688.2	1072.3	166.4	6.44411
Ccnd1	NM_007631.1	1328.9	207.4	6.40743
		293.3	46	6.37609
Cd53	NM_007651.2	485.6	76.5	6.34771
Tyrobp	NM_011662.2	769.9	121.7	6.32621
Ccnd1	NM_007631.1	7205.7	1153.4	6.24736
6330414G02Rik		94.8	15.2	6.23684
Kcnab2	NM_010598.2	119.1	19.1	6.2356
Ltbp2	NM_013589.1	175.5	28.2	6.2234
Cd63	NM_007653.1	884	142.5	6.20351
Fcgr3	NM_010188.2	686.7	110.8	6.19765
	BC038148.1	69.9	11.3	6.18584
1110017L21Rik	AK003755	135.9	22	6.17727
Xlkd1	NM_053247.3	98.2	15.9	6.1761
Fxyd5	NM_008761.2	141.4	22.9	6.17467
Csf2ra	NM_009970.1	658.3	106.8	6.16386
Rragd	NM_027491	58.5	9.5	6.15789
Adrb1	NM_007419	54.7	8.9	6.14607
Slc39a4	NM_028064.2	111.8	18.3	6.10929
Lbcl1	AK035683	230	37.7	6.1008
Villp	NM_011700	67.6	11.1	6.09009
S100a9	NM_009114.1	162.2	26.8	6.05224
4833427B12Rik	AK014776	100.7	16.7	6.02994
6720469N11Rik	NM_177138.2	65.6	10.9	6.01835
Arhgef2	NM_008487	107	17.8	6.01124
Srd5a2l	NM_020611.3	66.1	11	6.00909
Mt1	NM_013602.2	20945.9	3490.9	6.00014
Tnfrsf22	NM_023680.2	129.1	21.6	5.97685
Amn	NM_033603.2	107.4	18	5.96667
5730410E15Rik	NM_178765.2	86.4	14.5	5.95862
Tceal5	NM_177919	204.8	34.4	5.95349
A930008A22Rik	NM_172768	56.4	9.5	5.93684
St14	NM_011176.3	92	15.5	5.93548
Ptpns1	XM_149178.1	6575.9	1116.6	5.88922
Hist1h3b	NM_178203	159.1	27.1	5.87085
Basp1	NM_027395	940.7	161.3	5.83199
Fbn1	NM_007993	79.3	13.6	5.83088
Arhgap4	NM_138630.1	112.5	19.3	5.82902
P2ry6	NM_183168.1	458.4	78.8	5.81726
5830467P10Rik	NM_198029.1	120.9	20.8	5.8125
Pilra	NM_153510.1	126.4	21.8	5.79817
Slc8a1	NM_011406.1	79.2	13.7	5.78102
Sn	NM_011426.1	133.6	23.2	5.75862
Col3a1	NM_009930.1	310	53.9	5.75139
Tbxas1	NM_011539.2	329.3	57.4	5.73693
C330027I04Rik	NM_026561.2	58.5	10.2	5.73529
Ccdc3	XM_129987.2	458.5	80.2	5.71696
AA545217	NM_013726.1	116.9	20.5	5.70244
BC049975	XM_138237.2	218.2	38.3	5.69713
Tsrc1	NM_144899.2	99.1	17.4	5.6954
1110036D12Rik		74	13	5.69231
Emp3	NM_010129.1	259.8	45.9	5.66013
Abhd2	NM_018811.4	202.4	36	5.62222
	AK081844.1	94.4	16.8	5.61905
7420404O03Rik	AK078662	125.4	22.4	5.59821
Col1a1	NM_007742.2	60.9	10.9	5.58716
Hcst	NM_011827	79.7	14.3	5.57343
C230090D14	NM_173019.2	178.6	32.1	5.56386
5530400B01Rik		123.9	22.3	5.55605
Cybb	NM_007807	363.5	65.6	5.54116
Ctss	NM_021281.1	566	102.2	5.53816
Oas1g	NM_011852	131.2	23.8	5.51261
Enc1	NM_007930.3	271.5	49.3	5.5071
Kctd12	NM_177715	305.7	55.6	5.4982
Rapgef5	NM_175930.2	53.1	9.7	5.47423
		299.1	54.7	5.46801
4432409M07Rik	NM_153551.1	55.2	10.2	5.41176
Timp1	NM_011593	155	28.7	5.4007
A430104N18Rik		142.9	26.5	5.39245
Rtn4	NM_024226	74.3	13.8	5.38406
Dm15	NM_032418	1905.5	354	5.38277
Hcls1	NM_008225.1	137.5	25.6	5.37109
Gdf15	NM_011819.1	633.5	118.1	5.3641
Dhrs9	NM_175512	199.8	37.4	5.34225
Cyp2a5	NM_007812.1	16417.1	3077.7	5.33421
AI132321	NM_178911.2	531.7	100	5.317
Dock2	NM_033374.1	72	13.6	5.29412
Ly78	AK089613	59.7	11.3	5.28319
Cyln2	NM_009990	105.1	19.9	5.28141
0610041G09Rik	NM_183274	622.3	118.5	5.25148
Slc37a1	AK028984	74.5	14.2	5.24648
Dock2	NM_033374	118.7	22.7	5.22907
Adcy7	AK012436	100.1	19.2	5.21354
Cyp2a5	NM_007812.1	15146.2	2911.2	5.20273
Hist1h2ah	NM_175659.1	1002.6	194.3	5.16006
Cxcl9	NM_008599	161.2	31.3	5.15016
Treml4	NM_172623.1	81.6	15.9	5.13208
Cyba	NM_007806.1	1552	303.2	5.11873
Clecsf12	NM_020008.1	206.4	40.4	5.10891
Il28ra	NM_174851.2	64.8	12.7	5.10236
Mmp24	NM_010808	555	108.8	5.1011
Spon2	NM_133903.2	2656.1	521.5	5.09319
Coro1a	NM_009898.2	142.6	28	5.09286
LOC381150	XM_358516.1	248	48.8	5.08197
Tgfbr2	NM_009371.2	1496	295	5.07119
C1qg	NM_007574.1	1647.3	326.4	5.04688
Pira1	NM_011087.1	61.2	12.2	5.01639
Gngt2	NM_023121.1	169.5	34	4.98529
Cyp2a5	NM_007812.1	12148.1	2444.7	4.96916
Icam1	NM_010493.2	1171.7	236.2	4.96063
Camk1	NM_133926.1	65.9	13.3	4.95489
Map3k14	NM_016896.2	144.6	29.2	4.95205
Cdc42ep3	NM_026514	52.9	10.7	4.94393
Gbp1	NM_010259.1	398.5	80.8	4.93193
Pitpnm1	NM_008851.1	453.4	92.1	4.92291
1810054O13Rik	NM_026436.1	835.9	170.3	4.9084
2610001E17Rik	NM_026439.1	376.1	76.8	4.89714
2210013M04Rik	NM_178595.2	73.5	15.1	4.86755
Cxcl9	NM_008599.1	685.2	141	4.85957
Gpc1	NM_016696.1	570.5	117.4	4.85945
Tnfrsf12a	NM_013749.1	923.1	190.8	4.83805
4631422O05Rik	XM_156304.1	79.1	16.4	4.82317
Hist4h4	NM_175652.1	65.1	13.5	4.82222
Hist1h2ag	NM_178186.1	4083.7	848	4.81568
Slc11a1	NM_013612.1	121.1	25.2	4.80556
Hist1h2ai	NM_178182.1	3477.3	724.7	4.79826
Loxl1	NM_010729.2	147.3	30.7	4.79805
Alox5ap	NM_009663	372.8	77.7	4.79794
Gal3st1	NM_016922.2	162.9	34.1	4.77713
E430014K09Rik	AK088390	117.7	24.7	4.76518
Hivep3	NM_010657	71.9	15.1	4.76159
Scamp5	NM_020270.2	55.7	11.7	4.76068
1200002N14Rik	NM_027878.1	116.4	24.5	4.75102
D14Ertd171e	NM_177814.3	60.2	12.7	4.74016
C030002B11Rik		223.2	47.1	4.73885
Sh3kbp1	NM_021389.3	121.1	25.6	4.73047
A230102O09Rik		267	56.5	4.72566
Gpx7	NM_024198.1	167.4	35.5	4.71549
Lst1	XM_359281.1	518.8	110.1	4.71208
Phlda2	NM_009434	79.5	16.9	4.70414
Hist1h2ae	NM_178187.2	53.1	11.3	4.69912
1200013B08Rik	NM_028773.2	210.8	45.2	4.66372
Hist1h2ah	NM_175659.1	694.7	149	4.66242
Csf1r	NM_007779.1	601.6	129.5	4.64556
Serpinb6a	NM_009254.2	1467.8	316.4	4.63906
Saa2	NM_011314.1	488.7	105.6	4.62784
Emp3	NM_010129	979.1	211.8	4.62276
Npn3	NM_029688.2	2103.4	456.4	4.60868
LOC381687	XM_355664.1	158.3	34.4	4.60174
Anxa1	NM_010730.1	78.8	17.2	4.5814
Jak3	NM_010589	60.2	13.2	4.56061
Iqgap1	AK029434	52.1	11.5	4.53043
Slc16a5	XM_126601	1405	310.2	4.52934
	AY267348.1	73.8	16.3	4.52761
Ust	NM_177387	85.3	18.9	4.51323
Mthfd2	NM_008638	118	26.2	4.50382
Mbp	AK039047	76.7	17.1	4.48538
Tm7sf1	NM_031999	124.1	27.7	4.48014
Scara3	NM_172604.1	262.9	58.7	4.47871
Cxcl16	NM_023158.3	301.8	67.4	4.47774
Acas2l	NM_080575.1	65.7	14.7	4.46939
Map4k4	NM_008696.1	60.3	13.5	4.46667
Pkm2	NM_011099.2	252.2	56.5	4.46372
Axl	NM_009465.2	2277.4	513.5	4.43505
Hist1h2ak	NM_178183.1	1096.6	247.8	4.42534
P2rx4	NM_011026.1	66.3	15	4.42
CSF-1	X05010	86.1	19.5	4.41538
0610010O12Rik	XM_488847	1691	383.1	4.41399
Stk10	NM_009288.1	264.3	60.1	4.39767
Nid1	NM_010917.1	631.4	144.2	4.37864
Vav1	NM_011691.2	266.4	60.9	4.37438
Mcm5	NM_008566.1	319.7	73.1	4.37346
Iqgap1	NM_016721.1	694.3	158.8	4.37217
Mustn1	NM_181390.1	236.9	54.2	4.37085
8430426K15Rik		168.4	38.6	4.36269
Slc1a1	NM_009199.1	63.2	14.6	4.32877
Anxa3	NM_013470.1	612	141.7	4.31898
Iqgap1	NM_016721	488.2	113.1	4.31653
Cd97	NM_011925.1	316.4	73.5	4.30476
Oxct	AK010029	372	86.9	4.28078
4921501M20Rik	NM_028728.1	61.5	14.4	4.27083
Ccnd1	NM_007631.1	451.7	106.3	4.24929
Olig1	NM_016968.2	588.8	138.6	4.2482
Glipr1	NM_028608.1	265.9	62.6	4.2476
Tinag	NM_012033.2	202.9	47.8	4.24477
Ptpn18	NM_011206.1	385.3	90.8	4.24339
Hapln4	NM_177900.3	119.3	28.2	4.2305
E430002G05Rik	NM_173749	133.7	31.7	4.21767
Slfn2	NM_011408.1	129.2	30.7	4.20847
AW112037		2433	579.1	4.20135
Hist1h2an	NM_178184.1	1927	459.5	4.19369
Rbl1	NM_011249.1	54.4	13	4.18462
Serpina3g	XM_354694.1	628.1	150.4	4.1762
2900008M13Rik	XM_110121	320.3	76.7	4.17601
Nfkb2	NM_019408.1	130.2	31.2	4.17308
Cxcl1	NM_008176.1	2179.6	522.7	4.16989
Uhrf1	NM_010931.2	241.7	58.1	4.16007
S100a6	NM_011313.1	1118.1	268.9	4.15805
Rtn4	NM_194054.1	145.1	34.9	4.15759
Nqo1	NM_008706.1	209.2	50.5	4.14257
Clec2	NM_019985.1	235.9	57	4.1386
Slc7a7	NM_011405.1	185.4	44.8	4.13839
C730033N22Rik	AK050284	62.2	15.1	4.11921
Hrmt1l1	NM_133182	126.6	30.8	4.11039
Akr1b3	NM_009658.2	863.2	210.2	4.10657
Gmfg	NM_022024.1	65.7	16	4.10625
Stx11	XM_203312.2	119.9	29.2	4.10616
Abcg1	NM_009593.1	926.8	225.8	4.10452
Kctd12	NM_177715.2	159.5	39	4.08974
C1qa	NM_007572	1129.5	276.4	4.08647
Satb1	NM_009122.1	104.6	25.6	4.08594
Slco3a1	NM_023908.1	63.3	15.6	4.05769
H2-T22	NM_010397	116.6	28.8	4.04861
Prg	NM_011157.1	144.2	35.7	4.03922
Smoc2	NM_022315.1	586.2	145.2	4.03719
Synpo		1079.1	267.9	4.028
5330417C22Rik	XM_203978.3	60.4	15	4.02667
Pdk4	NM_013743.1	517.4	128.6	4.02333
Csrp1	NM_007791.2	757.3	188.3	4.02177
	AK081365.1	64.1	16	4.00625
Olfml3	NM_133859.1	152.6	38.1	4.00525
Lig1	NM_010715.1	198.4	49.6	4
6230400I06Rik		316.2	79.1	3.99747
Hk2	NM_013820.1	196.4	49.4	3.97571
Lgmn	NM_011175.1	2617.3	658.4	3.97524
Ostb	NM_178933.2	121.6	30.6	3.97386
5730528L13Rik	NM_028137.1	72.2	18.2	3.96703
Hist1h4m	NM_175657	239.1	60.4	3.95861
Fmo3	NM_008030.1	341.2	86.8	3.93088
1810011H11Rik	XM_358452	108.7	27.7	3.92419
Cenpe	NM_173762	161.6	41.2	3.92233
Aldh3b1	NM_026316.2	176.6	45.2	3.90708
Ifi205	NM_172648.2	74.6	19.1	3.90576
Laptm5	NM_010686.2	4328.5	1108.3	3.90553
BC013712	XM_131779.2	94.6	24.3	3.893
Mglap	NM_008597.2	120.2	30.9	3.88997
Abr	NM_198894.1	283	73.1	3.87141
Copeb	NM_011803.1	1145.7	296	3.87061
Ly6e	NM_008529	9384.9	2444.2	3.83966
Emr1	NM_010130.1	1529.7	398.4	3.83961
Ppap2c	NM_015817	4800.3	1250.8	3.83778
Sh3bgrl3	NM_080559.1	472.8	123.3	3.83455
2900075A18Rik		408.4	107.2	3.8097
Trpv2	NM_011706.1	113.9	30	3.79667
Apobec1	NM_031159.2	730.9	192.8	3.79098
Gdf3	NM_008108.1	96.5	25.5	3.78431
Xlr3a	NM_011726.1	312.1	82.5	3.78303
H2-M3	NM_013819.1	108.1	28.6	3.77972
Hist1h2ao	NM_178185.1	3930	1040.9	3.77558
Dock10	XM_129913.4	204.5	54.4	3.75919
Lpxn	NM_134152.1	281	75	3.74667
2610041P08Rik	NM_198008.1	186.4	49.8	3.74297
Ltbp3	NM_008520	135.8	36.3	3.74105
Smox	NM_145533.1	110.3	29.6	3.72635
Adamts2	NM_175643.1	132.5	35.6	3.72191
Pilra	NM_153510	306.3	82.4	3.71723
2900042O04Rik		62.3	16.8	3.70833
Trrp7	AK036731	127.8	34.5	3.70435
Fgd2	NM_013710.1	315.9	85.7	3.68611
4631422C13Rik	XM_128857.3	95.7	26	3.68077
9530034E10Rik		65.1	17.8	3.6573
Adrb2	NM_007420.2	72	19.7	3.65482
C130081G24		72.9	20	3.645
Chk	AK053818	299.7	82.3	3.64156
Tpx2	NM_028109.2	143.8	39.6	3.63131
Cyp2a5	NM_007812	27029.5	7452	3.62715
Spp1	NM_009263.1	2464.2	679.8	3.62489
Il10rb	NM_008349.1	378.5	104.5	3.62201
AI854251	XM_128597.4	931.1	257.3	3.61873
Pygb	NM_153781.1	86.8	24	3.61667
Aif1	NM_019467.2	165.8	45.9	3.6122
Snn	NM_009223	113.1	31.4	3.60191
Pdlim4	NM_019417.1	160.2	44.5	3.6
Gltp	NM_019821.2	996.4	278	3.58417
2310005E10Rik	NM_172398.2	200.6	56.2	3.5694
Abcg1	NM_009593	70.8	19.9	3.55779
Hist1h2af	NM_175661.1	2622.6	737.3	3.55703
Anln	NM_028390.1	192.5	54.2	3.55166
Mvp	NM_080638.1	2837.4	800.1	3.54631
Inpp5d	NM_010566.1	122.5	34.6	3.54046
Pkib	AK005281	99.4	28.1	3.53737
2310014H01Rik	XM_355011.1	770.8	218	3.53578
Prg	NM_011157.1	405.7	114.9	3.5309
P2ry14	NM_133200.2	416.6	118.1	3.52752
Slc7a8	NM_016972.2	224.5	63.8	3.51881
Tnfrsf11b	NM_008764.2	130.3	37.1	3.51213
Man1c1	NM_207237	81	23.1	3.50649
Lcp2	NM_010696.2	178.6	51.1	3.49511
Col6a1	NM_009933.1	210.9	60.7	3.47446
Cdc20	NM_023223.1	53.5	15.4	3.47403
Elf3	NM_007921.1	60.1	17.3	3.47399
AI481214	NM_054098.2	113.1	32.6	3.46933
Mki67	XM_133912.3	133.5	38.5	3.46753
	BC064076.1	109	31.5	3.46032
Hist1h4m	NM_175657.1	801.5	232.2	3.45177
Slc6a8	NM_133987.1	407.8	118.3	3.44717
Hist1h2ai	NM_178182	3523.1	1022.4	3.44591
1110008L20Rik	NM_028643.1	296.6	86.5	3.4289
Fgl2	NM_008013.2	79.8	23.3	3.42489
Mfge8	NM_008594	631	184.3	3.42377
C130033B18Rik	AK048072	95.4	27.9	3.41935
Ehd4	NM_133838.2	617	180.5	3.41828
LOC381171	XM_358520.1	67.8	19.9	3.40704
Myh10	NM_175260.1	164.2	48.4	3.39256
AA175286	NM_010156.2	1248.4	369.3	3.38045
Wbscr5	NM_022964.2	70.8	21	3.37143
Gcnt1	NM_173442.1	104.5	31	3.37097
Bcl2	NM_009741.2	56.9	16.9	3.36686
4930553C05Rik	AK016099	98.6	29.3	3.36519
Asns	NM_012055.1	95.9	28.6	3.35315
Mpeg1	XM_129176	2817.6	843.1	3.34195
Cdc42ep5	NM_021454.3	100.9	30.2	3.34106
Lor	NM_008508.1	57.4	17.2	3.33721
1200009F10Rik	NM_026166.1	60.4	18.1	3.33702
Prkcb	NM_008855.1	238.5	71.5	3.33566
2600017H08Rik	NM_025565.1	107.9	32.5	3.32
Sftpd	NM_009160.1	56.7	17.1	3.31579
Cyp2c39	NM_010003.1	12121	3660.6	3.31121
1200015A22Rik	NM_028766.1	755	228.8	3.29983
Ptpn8	NM_008979.1	64.6	19.6	3.29592
Sox9	NM_011448	553.6	169	3.27574
Sult1e1	NM_023135.1	279.3	85.4	3.27049
Entpd2	NM_009849.1	246.7	75.5	3.26755
Pttg1	NM_013917.1	390.1	119.5	3.26444
2310067E08Rik	NM_028013.1	321.2	98.4	3.26423
Krt2-8	NM_031170.1	12621.1	3868.9	3.26219
6330439P19Rik	AK031886	87.1	26.7	3.26217
Btc	NM_007568.2	268.8	82.4	3.26214
Unc5b	NM_029770	356.2	109.5	3.25297
Rab8b	NM_173413.2	647.7	199.4	3.24824
1300018P11Rik	NM_025829.2	438.7	135.1	3.24722
Prkcd	NM_011103.1	428.9	132.6	3.23454
1810046I24Rik	NM_027218.1	82.7	25.6	3.23047
LOC231663	XM_124621.2	9903.5	3074.8	3.22086
A630077B13Rik	NM_175449.3	131.9	41	3.21707
Gus	NM_010368.1	66.9	20.8	3.21635
Pdcd1lg1	NM_021893.2	276.1	85.9	3.2142
Slc11a1	NM_013612.1	96.3	30	3.21
Arl10b	NM_026823.1	2720.4	851.4	3.19521
BC036718	NM_153136.1	4027.3	1261.1	3.19348
Plac8	NM_139198.1	739.2	231.5	3.19309
Hist1h3e	NM_178205	227.4	71.3	3.18934
Klk8	NM_008457.1	59.3	18.6	3.18817
2310061F22Rik	XM_134537.3	157.4	49.4	3.18623
Rasgrp1	NM_011246.2	318.9	100.1	3.18581
Gstm2	NM_008183.2	1930.2	606	3.18515
Ear3	NM_017388.1	177.4	55.7	3.18492
Cd9	NM_007657.2	1217.2	382.9	3.1789
Nrm	NM_134122.1	296.6	93.5	3.17219
0610007N19Rik	AK007719	84	26.5	3.16981
Ly6a	NM_010738.2	856.4	271.2	3.15782
A130001G05Rik		54.6	17.3	3.15607
Hn1	NM_008258.1	1141.8	362.1	3.15327
Ms4a6c	NM_028595	100.8	32	3.15
Fstl1	NM_008047.2	164.7	52.3	3.14914
Cd151	NM_009842.1	68.9	21.9	3.14612
Fxyd5	NM_008761.2	246.7	78.5	3.14268
Gadd45g	NM_011817.1	145.9	46.5	3.13763
Lrp11	NM_172784.1	75.9	24.2	3.13636
Ckb	NM_021273.2	1653	527.8	3.13187
Tcirg1	NM_016921.2	72.8	23.3	3.12446
Fyb	NM_011815.1	135.5	43.4	3.12212
Pira3	NM_011090.1	77.3	24.8	3.11694
Cpeb1	NM_007755.1	252.8	81.2	3.1133
Abi3	NM_025659.1	494.6	159.3	3.10483
Col12a1	AK076278	188.2	60.8	3.09539
Renbp	NM_023132.1	242	78.3	3.09068
Cstb	NM_007793.2	12408.8	4023.3	3.08423
Folr2	NM_008035	392.2	127.2	3.08333
Rod1	NM_144904.1	85.7	27.8	3.08273
Osmr	NM_011019.1	81.6	26.5	3.07925
Tfpi	NM_011576.1	52.3	17	3.07647
Ctgf	NM_010217	143.6	46.7	3.07495
Cdc20	NM_023223.1	59.2	19.3	3.06736
1700093E07Rik	NM_133685.1	457.2	149.1	3.0664
Rpl27a	NM_011975.2	57.3	18.7	3.06417
Ppl	NM_008909	747.4	244	3.06311
Fchsd1	NM_175684.3	224	73.3	3.05593
Col16a1	NM_028266.3	300.3	98.3	3.05493
Rab8b	NM_173413.2	666.9	218.9	3.0466
4833424O12Rik		63.3	20.8	3.04327
Nt5c2	NM_029810.2	57.8	19	3.04211
Cerk	NM_145475	547.1	180.2	3.03607
Gpr124	NM_054044.1	94.1	31	3.03548
Myh10	NM_175260	375	123.6	3.03398
Arpc1b	NM_023142.1	928.1	307.7	3.01625
Ctsk	NM_007802.2	65.1	21.6	3.01389
Cotl1	XM_150115.1	352.5	117.4	3.00256
Tcrb-V13		296.4	98.8	3
Ptk9l	NM_011876.2	127.1	42.4	2.99764
Dscr1l2	NM_022980.2	330.1	110.2	2.99546
Dpt	NM_019759.1	64.7	21.6	2.99537
Fkhl18	NM_010226.1	112.8	37.7	2.99204
Myo1g	NM_178440.2	225.4	75.4	2.98939
Rhod	NM_007485.2	1403	469.4	2.98892
Emilin1	NM_133918.1	137.2	46	2.98261
3010003L21Rik	NM_175404.2	58.7	19.7	2.9797
1110004P15Rik		876.4	294.4	2.9769
Vsig4	NM_177789.2	2282.6	767.3	2.97485
H2-T10	NM_010395.2	2304.8	775.2	2.97317
Oasl1	NM_145209.2	120.8	40.7	2.96806
Hrb	NM_010472.1	91.4	30.9	2.95793
Cygb	NM_030206.1	1233	417	2.95683
Msn	AK031171	111.9	37.9	2.95251
H2-D4	NM_008200.1	242	82	2.95122
Hist1h4f	NM_175655.1	545.6	185.3	2.94441
Col6a3	NM_009935.1	347.4	118	2.94407
Vcam1	NM_011693.2	1099.7	374.4	2.93723
Arpc1b	NM_023142.1	757.5	258.3	2.93264
Ssbp4	XM_356132.1	543.1	185.2	2.93251
Trim47	NM_172570.2	150.4	51.3	2.93177
Rad51l1	AK077994	508.9	173.6	2.93145
	AK050360.1	87.2	29.8	2.92617
Icmt	XM_131821.3	57.3	19.6	2.92347
Rbp1	NM_011254.2	2340.9	801.3	2.92138
Tmc7	NM_172476.2	75	25.7	2.91829
LOC245069	XM_159529.3	91.2	31.3	2.91374
Dscr1	NM_019466.2	117	40.2	2.91045
Gmip	NM_198101.1	89.2	30.7	2.90554
T2bp	NM_145133.2	164.7	56.7	2.90476
Pawr	XM_125814.2	226.3	78.1	2.89757
Tpm1	NM_024427	733.9	253.3	2.89735
Htatip2	NM_016865.2	6106.6	2108.1	2.89673
4930533K18Rik		107.4	37.1	2.89488
Hao3	NM_019545.2	62.2	21.5	2.89302
5830417C01Rik	NM_024282.2	97.2	33.6	2.89286
Ptp4a3	NM_008975.2	82.4	28.5	2.89123
Plscr1	NM_011636.1	1086	375.9	2.88907
Clecsf10	NM_020001.1	191	66.4	2.87651
Gstm6	NM_008184.1	24125.5	8390.1	2.87547
Serpina7	NM_177920	1138.9	396.4	2.87311
Fath	XM_134149.5	136	47.4	2.8692
Nedd9	NM_017464.2	182.7	63.8	2.86364
H2-L		8187.7	2861.1	2.86173
Emp1	NM_010128.3	573.2	200.5	2.85885
Dock11	XM_486647	73.7	25.8	2.85659
9430080K19Rik		557.4	195.4	2.85261
Hist1h4f	NM_175655.1	72.4	25.4	2.85039
P2ry13	NM_028808.1	226.3	79.6	2.84296
Gstm2	NM_008183.2	3985.2	1404.4	2.83765
Hip1	NM_146001	367.1	129.4	2.83694
C1qr1	NM_010740.1	241.5	85.3	2.83118
Hist1h1c	NM_015786	7319.6	2594.6	2.82109
Myef2	NM_010852.1	69.8	24.8	2.81452
Tm4sf4	NM_145539.1	3370.3	1198.4	2.81233
Hist2h2be	NM_178214.1	133.6	47.6	2.80672
4832420L08Rik	AK029315	63.7	22.7	2.80617
Rad51l1	NM_009014.2	362.2	129.2	2.80341
Mcm2	NM_008564.1	136.9	48.9	2.79959
Tnip1	NM_021327.1	654.8	234.1	2.7971
2810048G17Rik	NM_133746.2	121.9	43.6	2.79587
Arhgap9	NM_146011.1	101.6	36.4	2.79121
E430025L02Rik	NM_146069	354.2	126.9	2.79117
BC016495	NM_145497.1	136.2	48.9	2.78528
Mgst3	NM_025569.1	1171.2	420.6	2.78459
LOC270157	XM_196479.2	56.2	20.2	2.78218
Ifi30	NM_023065.2	498.4	179.5	2.7766
Gpx3	NM_008161.1	175.9	63.4	2.77445
D630011N09Rik	AK085324	108.5	39.2	2.76786
Scamp5	NM_020270.2	1434.9	519.5	2.76208
Arl2bp	NM_024191.1	65.7	23.8	2.7605
2310016E02Rik	AK003569	308	111.7	2.75739
4732465J09Rik	XM_356161	157.4	57.1	2.75657
Hist1h4d	NM_175654.1	67.4	24.5	2.75102
Cyp2c55	NM_028089.1	303.2	110.7	2.73893
Acate2	NM_019736.2	53.3	19.5	2.73333
H2-T22	NM_010397.2	392.6	143.8	2.73018
Dfna5h	XM_147318.1	71.7	26.3	2.72624
Ywhah	NM_011738	89.9	33	2.72424
Eml1	XM_127139.5	88.5	32.6	2.71472
D330008I21Rik	AK052205	146.2	53.9	2.71243
F830005D05Rik		56.3	20.8	2.70673
Lgals3bp	NM_011150.1	1969.2	727.7	2.70606
A630001G21Rik	NM_177055.2	83	30.7	2.70358
Copg2as2	AK018238	62.3	23.1	2.69697
Ifit2	NM_008332.2	142.9	53	2.69623
Ets2	NM_011809.2	2159.1	802.5	2.69047
Smpd3	NM_021491.2	402.4	150.2	2.67909
Pip5k2a	NM_008845.2	631.2	235.7	2.67798
Elmo1	NM_198093.2	188.7	70.5	2.6766
Tbc1d1	NM_019636	130.5	48.8	2.67418
AI606181	NM_183215	59	22.1	2.66968
Tpm4	XM_134274.3	1163.7	436.6	2.66537
Mmp23	NM_011985.1	76.2	28.6	2.66434
Apoa4	NM_007468.1	17283.6	6493.2	2.6618
AU020206		181.8	68.3	2.66179
Nedd9	NM_017464.2	293.7	110.4	2.66033
6030404G09Rik	AK077882	258.5	97.2	2.65947
2810027O19Rik	NM_026613.2	92	34.6	2.65896
Sfxn3	NM_053197.2	196.8	74.1	2.65587
D2Bwg0891e	NM_026797.1	2589.8	975.2	2.65566
Serpina7	NM_177920.4	1180.5	444.6	2.6552
Galnt10	NM_134189.2	331.3	124.9	2.65252
B4galt5	NM_019835	54.6	20.6	2.65049
5330401P04Rik	NM_172654	56.9	21.5	2.64651
Rhbdf1	NM_010117.1	987.4	373.1	2.64648
4.93343e+26	NM_177858.2	138.9	52.6	2.64068
Gsta4	NM_010357.1	4976	1884.7	2.64021
Gcap27		78.2	29.7	2.633
Tmc6	NM_145439.1	113.4	43.1	2.63109
Epb4.1l2	NM_013511.1	88.6	33.7	2.62908
Frzb	NM_011356.2	77.8	29.6	2.62838
Rab3d	NM_031874.3	384.4	146.3	2.62748
D12Ertd553e	NM_029758.3	619.4	236.1	2.62346
2900060B22Rik		90.9	34.7	2.6196
3321401G04Rik	XM_133096.5	55	21	2.61905
AA960558	NM_133942.1	2087.9	797.8	2.61707
Cblb	XM_358863.1	71.7	27.4	2.61679
Unc93b	NM_019449.1	270.7	103.7	2.61041
LOC223672	XM_128064.4	2677	1025.8	2.60967
Nagk	NM_019542.1	393.3	150.9	2.60636
Dyrk3	NM_145508.1	147.5	56.6	2.60601
Cp	NM_007752	268.4	103.1	2.6033
Nfkbie	NM_008690.2	73.4	28.2	2.60284
Mat2a	NM_145569	535.5	206	2.59951
Rab11fip5	XM_358365.1	93.5	36	2.59722
Cdc42ep3	NM_026514.1	63.5	24.5	2.59184
Hlx1	NM_008250.1	104.4	40.3	2.59057
A130092J06Rik	NM_175511.2	144.8	55.9	2.59034
Tmprss2	NM_015775.2	253.3	98	2.58469
Fkbp1a	NM_008019	1468.5	569.2	2.57994
Cklfsf3	NM_024217.2	402.4	156	2.57949
App	NM_007471.1	1073.4	417	2.5741
Tuba1	NM_011653	55.5	21.6	2.56944
Ppp1r9b	NM_172261.1	223.4	87	2.56782
AI605517		57.5	22.4	2.56696
Fbln2	NM_007992.1	144.3	56.3	2.56306
Mylc2b	NM_023402.1	1361.9	531.4	2.56285
Casp1	NM_009807.1	452.5	176.6	2.56229
Tcrb-V8.2		72.5	28.3	2.56184
4733401I05Rik		96	37.5	2.56
0610006O14Rik	NM_133764.1	96.6	37.9	2.54881
Cxcl16	NM_023158	90.9	35.7	2.54622
Hist1h3d	NM_178204.1	201.7	79.3	2.54351
Lum	NM_008524	487.2	191.8	2.54015
Kcnk13	NM_146037.1	89.9	35.4	2.53955
E030030K01Rik	AK087162	107	42.2	2.53555
Hspa1b		53.7	21.2	2.53302
Msn	NM_010833	937.9	370.3	2.53281
Zfp90	NM_011764.2	143.2	56.7	2.52557
		59.3	23.5	2.5234
B230385N19Rik	AK046447	152.8	60.6	2.52145
Alas1	NM_020559.1	10581.2	4200	2.51933
Mbd1	AK007371	79.3	31.5	2.51746
4930438D12Rik	AK015335	95.9	38.1	2.51706
Pfc	XM_135820.3	2412.6	960.7	2.51129
9030405D14Rik	NM_027819.1	56.4	22.5	2.50667
LOC381259	XM_355201.1	408.6	163.7	2.49603
Napsa	NM_008437.1	57.4	23	2.49565
D430039N05Rik	NM_175514.1	86.3	34.6	2.49422
Tyki	NM_020557.3	164.6	66	2.49394
Hexb	NM_010422.1	87.7	35.2	2.49148
Pkig	NM_011106.1	104.6	42	2.49048
Csf3r	NM_007782.1	56.2	22.6	2.48673
Krt1-18	NM_010664.1	5721.9	2303.4	2.48411
Krt1-23	NM_033373.1	488.6	196.7	2.48399
Camk1	NM_133926.1	140.7	56.7	2.48148
Cd86	NM_019388.2	176.6	71.2	2.48034
Hmox1	NM_010442.1	321	129.5	2.47876
Dcn	NM_007833.1	1731	701	2.46933
Il4i1	NM_010215.1	60.7	24.6	2.46748
4831437C03Rik	AK029240	52.8	21.4	2.46729
Rassf1	NM_019713	56	22.7	2.46696
Adam15	NM_009614.1	67.1	27.2	2.46691
Gstm2	NM_008183.2	14992.7	6078.5	2.46651
Cyp2a4	NM_009997	14109.4	5721.5	2.46603
Col6a1	NM_009933.1	318.5	129.2	2.46517
D330037A14Rik	NM_153537.3	82.7	33.6	2.46131
Spag5	NM_017407.1	59.3	24.1	2.46058
Calr3	NM_029782.2	133.6	54.3	2.46041
Rad51l1	NM_009014.2	2272.6	924.9	2.45713
2610300B10Rik	XM_283661	237.1	96.5	2.45699
Apoa4	NM_007468	50073.9	20384.6	2.45646
Saa1	NM_009117.1	2125.1	865.2	2.4562
C230050J15Rik	AK048763	192.9	78.6	2.4542
Atp9a	NM_015731.2	165.4	67.4	2.45401
Usp18	NM_011909.1	383.5	156.5	2.45048
Ppl	XM_148334.1	339.1	138.4	2.45014
9530090G24Rik	NM_145537.1	216	88.2	2.44898
Zfhx1b	AK012377	67.8	27.7	2.44765
Mat2a	NM_145569	193.3	79	2.44684
Gstm1	NM_010358.2	39224.6	16055.1	2.44312
2510048K03Rik	NM_028243.1	628.5	257.4	2.44172
1810009M01Rik	NM_023056.2	6302.4	2582.1	2.4408
Ifngr1	NM_010511.1	455.3	186.7	2.43867
4833422F24Rik	NM_029021.1	119.4	49	2.43673
Thbs2	NM_011581.1	58.7	24.1	2.43568
2310015A16Rik		446.7	183.7	2.43168
Adamts2	NM_175643.1	201.9	83.1	2.4296
Mknk2	NM_021462	232.1	95.6	2.42782
Serpinh1	NM_009825	556.6	229.3	2.42739
Mlp	NM_010807.2	368.5	151.9	2.42594
4632417K18Rik	NM_026640.1	289.7	119.5	2.42427
Itm2c	NM_022417.1	2225.4	918.5	2.42286
H2-L		20302.1	8386.9	2.42069
Pdgfa	NM_008808	1364.6	564.7	2.4165
2007-09-07	NM_009859.2	54.6	22.6	2.41593
H2-D1	NM_010380.2	15327.6	6353.8	2.41235
Col14a1	AK052963	356.8	148.1	2.40918
		54.8	22.8	2.40351
Dkk3	NM_015814.2	150.4	62.6	2.40256
Guca1a	NM_008189.2	334.1	139.1	2.40187
Agtrap	NM_009642.3	83.3	34.7	2.40058
Zfp28	NM_009552.1	69.5	29	2.39655
Tor2a	AK019246	101.7	42.5	2.39294
AU040829	NM_175003.2	197.4	82.5	2.39273
Mgst3	NM_025569.1	2302.7	963.1	2.39093
4930577N17Rik		55.7	23.3	2.39056
Eln	NM_007925.2	63.3	26.5	2.38868
1700012B18Rik	NM_027950.1	4867.2	2040.3	2.38553
Col4a1	NM_009931.1	709.4	298.1	2.37974
Csf1	NM_007778.1	59	24.8	2.37903
Slc2a3	NM_011401.2	52.3	22	2.37727
BC022145	NM_144830.1	223.7	94.1	2.37726
4833427B12Rik	XM_195728.3	83.6	35.2	2.375
Hp	NM_017370.1	19534.5	8246.3	2.36888
H2-T9	NM_010399	4186.5	1767.4	2.36873
9530083O12Rik		119.3	50.5	2.36238
1810048P08Rik	NM_133717.1	66.1	28	2.36071
Traf1	AK089281	60.9	25.8	2.36047
Dcn	NM_007833.1	4326.7	1833.3	2.36006
Ucp2	NM_011671.2	556.7	235.9	2.3599
Gas6	NM_019521.1	1005.8	426.8	2.35661
Gss	NM_008180.1	383.5	162.8	2.35565
Tpm4	XM_134274.3	134.8	57.3	2.35253
Limk1	NM_010717.1	156.1	66.4	2.3509
BC003236	NM_030249.2	115.6	49.2	2.34959
Arl6ip5	NM_022992.1	591.2	252.3	2.34324
Slc9a6	NM_172780.1	62.3	26.6	2.34211
Dusp3	NM_028207.1	75.6	32.3	2.34056
8430408G22Rik	NM_145980.1	4199.3	1794.8	2.3397
2310015N21Rik	NM_181397.1	64.1	27.4	2.33942
Hist1h4i	NM_175656	769.2	330.2	2.3295
Rttn	NM_175542.3	73.1	31.4	2.32803
C330027I04Rik	NM_026561.2	223	95.8	2.32777
Cyp3a41	NM_017396.1	276.5	118.8	2.32744
Mef2c	NM_025282.1	139.7	60.1	2.32446
BC011209	NM_145447.1	461.1	198.5	2.32292
Marcks	NM_008538	662.1	285.4	2.3199
Hspbap1	NM_175111.2	196	84.5	2.31953
Ifi205	NM_172648	599	258.3	2.31901
Slc25a30	NM_026232	757.8	327.7	2.31248
LOC329190	XM_283627.2	79	34.2	2.30994
Incenp	NM_016692.1	89.2	38.7	2.30491
Col4a2	NM_009932.2	1439.5	625.6	2.30099
Car2	NM_009801.3	130.9	57	2.29649
H2-T17	NM_010396	5468.3	2383	2.29471
B230312L03Rik	AK045826	236.4	103.1	2.29292
		56.9	24.9	2.28514
9130020G22Rik	XM_131773.3	332.6	145.7	2.28277
Lrmp	NM_008511	163.1	71.5	2.28112
1700012F10Rik	XM_181295.3	69.1	30.3	2.28053
Col5a1	NM_015734.1	417.5	183.3	2.27769
Slc13a3	NM_054055.1	467	205.1	2.27694
D930046M07Rik	AK053082	71.3	31.4	2.2707
Bicc1	NM_031397.1	284	125.1	2.27018
Ppp2r5c	AK012612	74.9	33	2.2697
9530090G24Rik	NM_145537.1	215.7	95.1	2.26814
LOC234486	XM_134462.2	79	34.9	2.26361
Flna	XM_289920.2	326.8	144.4	2.26316
Tgif	NM_009372.2	831.2	367.5	2.26177
Zfp532	NM_207255.1	72.8	32.2	2.26087
BC025206	NM_146184.2	52.9	23.4	2.26068
9030625A04Rik	NM_172488.1	1262.2	558.9	2.25836
Sdf2l1	XM_147210.1	308.8	136.8	2.25731
Tmc6	NM_145439.1	278.4	123.4	2.25608
Plk3	NM_013807.1	1408.9	624.8	2.25496
1110008L20Rik	NM_028643.1	1937.6	859.5	2.25433
9330129D05Rik	NM_178799.2	437.1	193.9	2.25425
Cttn	NM_007803.1	79.7	35.4	2.25141
Pfkfb3	NM_172976.1	466.2	207.1	2.25109
Crip1	NM_007763	255.7	113.6	2.25088
Tnxb	NM_031176.1	65.7	29.2	2.25
E130203B14Rik	NM_178791.2	86.7	38.6	2.24611
Rps19	NM_023133.1	60.8	27.1	2.24354
9530006C21Rik		533.7	238.1	2.2415
Edg5	NM_010333	823.8	368.3	2.23676
D130016B08Rik		86.6	38.8	2.23196
Evc2	NM_145920	67.6	30.3	2.23102
Tnfaip8	NM_134131.1	126.7	56.9	2.22671
LOC381201	XM_355134.1	185.2	83.2	2.22596
2200002D01Rik		1250.9	563	2.22185
LOC114601	NM_053252.1	78.4	35.3	2.22096
Tnfrsf8	NM_009401.1	92.4	41.7	2.21583
A830007P12Rik	NM_146115.2	151.1	68.2	2.21554
Stk17b	NM_133810.2	111.6	50.4	2.21429
Lmna	NM_019390.1	999.4	451.8	2.21204
9130017C17Rik	NM_027840.1	71	32.1	2.21184
Slc25a30	NM_026232.1	365.8	165.5	2.21027
Sqstm1	NM_011018.1	7912.6	3583.7	2.20794
Myo9b	NM_015742.1	1098.8	498.7	2.20333
Hist2h3c2	NM_054045.2	247.5	112.5	2.2
9530081N05Rik	AK035655	125.6	57.1	2.19965
Rdh9	NM_153133.1	4671.1	2125.1	2.19806
D930007N19Rik		71.4	32.5	2.19692
	AK081027.1	159.4	72.7	2.19257
2310058A03Rik	AK009971	67.3	30.8	2.18506
0610011I04Rik	NM_025326.2	1781	815.1	2.18501
Irf7	NM_016850.1	315	144.2	2.18447
Hist1h4k	NM_178211.1	179.5	82.2	2.1837
Hk1	NM_010438	254.5	116.6	2.18268
4732486I23Rik	XM_130565.3	63.5	29.1	2.18213
B130017P16Rik	NM_178638.2	75.2	34.5	2.17971
Igfbp3	NM_008343.1	301.2	138.2	2.17945
Lass5	NM_028015.2	75.4	34.6	2.17919
5830484A20Rik	XM_284155.2	65.3	30	2.17667
Atp2a3	NM_016745.2	126	57.9	2.17617
1200015A19Rik	NM_026388.1	182.7	84	2.175
Pgm3	NM_028352.2	133.1	61.2	2.17484
Gja1	NM_010288.2	521.7	239.9	2.17466
Grn	NM_008175.2	4824.6	2219.9	2.17334
Cyp2a4	NM_009997.1	6051.7	2785.8	2.17234
Ifngr2	NM_008338.2	1968.5	906.2	2.17226
1700022C02Rik	NM_025495.1	150.9	69.5	2.17122
D12Ertd647e	NM_026790.1	5182.3	2387.5	2.1706
5830417C01Rik	NM_024282.2	490.9	226.5	2.16733
Minpp1	NM_010799.1	79.5	36.7	2.16621
1110060M21Rik	NM_025424.1	1725.7	797.2	2.1647
Clecsf13	NM_016751.2	1451.3	672.7	2.15743
Csad	NM_144942	2067.8	958.6	2.1571
Sdcbp	NM_016807	692.6	321.2	2.15629
LOC384710	XM_357808.1	411.4	190.8	2.15618
Thbd	NM_009378.1	66.6	30.9	2.15534
AI481214	NM_054098.2	144.8	67.2	2.15476
	BC068122.1	106.2	49.3	2.15416
Armcx1	NM_030066.2	65.7	30.5	2.1541
A830007P12Rik	NM_146115.2	304.9	141.6	2.15325
Mylc2b	NM_023402.1	7481.4	3476.1	2.15224
3110050N22Rik	NM_173181.1	156.8	72.9	2.15089
1700012F10Rik	AK005902	543.3	252.7	2.14998
Ica1	NM_010492.2	66.4	30.9	2.14887
Arl6ip5	NM_022992.1	408.3	190.3	2.14556
Pld3	NM_011116.1	368.3	171.7	2.14502
Chka	NM_013490.1	624.2	291.2	2.14354
Gnb1	NM_008142.2	1090	509.1	2.14103
Dnmt1	NM_010066.2	108.1	50.5	2.14059
Hexa	NM_010421	1687.1	789.8	2.13611
Aldh3a2	NM_007437	11620.4	5440	2.1361
Cyp3a11	NM_007818.2	24484.1	11472	2.13425
2810417M05Rik	NM_026516.1	64.4	30.2	2.13245
Gpx4	NM_008162	19811.7	9318.6	2.12604
Cklfsf4	NM_153582.3	381.4	179.4	2.12598
Ostf1	NM_017375.1	1478.3	695.5	2.12552
Cyr61	NM_010516.1	75.2	35.4	2.12429
Ggta1	NM_010283.1	102.6	48.3	2.12422
Ampd3	NM_009667	68.4	32.2	2.12422
Dmn	NM_207663.2	94	44.3	2.1219
Unc5b	NM_029770.1	141.7	66.8	2.12126
Lmna	NM_019390.1	2122.7	1001.6	2.11931
Gas2l1	NM_144560.1	262.1	123.7	2.11884
0610007L01Rik	AK002297	1969.7	931.4	2.11477
Gdf10	NM_145741.2	170.8	80.8	2.11386
Mylc2b	NM_023402	1912.3	905.5	2.11187
Pofut2	NM_030262.2	71.8	34	2.11176
Rtn4	NM_194054.1	3965.8	1878.1	2.1116
Flot1	NM_008027.1	1597	756.6	2.11076
Rassf4	NM_178045.3	436.5	207	2.1087
Hist1h4i	NM_175656.1	385.5	183	2.10656
Bat1a	NM_019693.2	90.7	43.1	2.10441
Sat1	NM_009121.3	3263.5	1551.2	2.10386
Scd2	NM_009128.1	700.6	333.1	2.10327
Arntl	NM_007489.1	279.6	133	2.10226
Igfbp7	NM_008048.1	10855.5	5166.6	2.10109
Cp	AK033842	173.5	82.6	2.10048
Adfp	NM_007408.2	6582.7	3139.4	2.0968
Gus	NM_010368.1	239.4	114.2	2.09632
Msn	NM_010833.1	89.6	42.8	2.09346
2210415K03Rik		53.8	25.7	2.09339
4930463P07Rik		191.7	91.6	2.09279
Tnxb	NM_031176	117.6	56.2	2.09253
LOC223653	XM_147965.2	459.7	220	2.08955
3110068G20Rik		64.9	31.1	2.08682
LOC381358	XM_355324.1	55.7	26.7	2.08614
Tgm2	NM_009373.2	4339.7	2081.1	2.08529
4.93343e+26	NM_177858.2	147.6	70.8	2.08475
Cyp7a1	NM_007824.2	4176.5	2003.4	2.08471
Rps24	NM_011297.2	131.1	62.9	2.08426
	AK011353.1	286.5	137.5	2.08364
Sepn1	NM_029100.1	337.6	162.1	2.08267
Grb10	NM_010345	181.4	87.1	2.08266
Crym	NM_016669.1	68.9	33.1	2.08157
Slc39a4	NM_028064.2	4563.7	2192.6	2.08141
Tens1	XM_109868	278.8	134	2.0806
Arhgef5	XM_133067.3	832.5	400.4	2.07917
A930001D11Rik	AK044207	102.5	49.3	2.07911
Sdc3	NM_011520.2	1106.2	532.3	2.07815
Psmb8	NM_010724	2239.6	1078.2	2.07717
Nagk	NM_019542.1	638.1	307.2	2.07715
Gstm4	NM_026764.2	1290.7	621.6	2.07642
Chk	AK014174	414.5	199.8	2.07457
0610012H03Rik	NM_028747.1	177.9	85.9	2.07101
Crim1	XM_128751.4	227.7	110	2.07
LOC98434		251.9	121.7	2.06984
2610002J02Rik	XM_131827.3	429.9	207.8	2.06882
Ctse	NM_007799	1315.2	636.1	2.0676
Pvrl1	XM_147334.1	61.4	29.7	2.06734
Grwd1	NM_153419.1	65.2	31.6	2.06329
	AF390178.1	55.5	26.9	2.0632
Mmp9	NM_013599.2	79	38.3	2.06266
Upp1	NM_009477.1	79	38.3	2.06266
Ifi30	NM_023065.2	265.9	129.1	2.05964
D630004K10Rik		1041.7	505.8	2.05951
1700023M03Rik	NM_027078.1	221.9	107.8	2.05844
6720458D17Rik		785.6	381.7	2.05816
Sh3glb1	NM_019464.1	53.7	26.1	2.05747
BC032967		82.9	40.3	2.05707
Itgal	NM_008400.1	101.8	49.5	2.05657
Ube1l	NM_023738.2	725.2	352.8	2.05556
Rcn3	NM_026555.1	83.4	40.6	2.05419
LOC382162	XM_356262.1	52.1	25.4	2.05118
2600003E23Rik	NM_027373	137	66.8	2.0509
Ccrl2	NM_017466.3	75.6	36.9	2.04878
Mat2a	NM_145569	1342	655.4	2.0476
Rassf4	NM_178045.3	276	134.8	2.04748
Nudt13	NM_026341.1	89.2	43.6	2.04587
Nap1l1	NM_015781.2	1002.3	490	2.04551
2810489O06Rik	NM_175386.3	417.8	204.4	2.04403
A930001C03Rik		160	78.3	2.04342
4921528G01Rik	NM_023884.2	381.8	187.1	2.04062
Robo1	NM_019413.1	56.3	27.6	2.03986
Myo9b	NM_015742.1	468.2	230	2.03565
Rasa2	NM_053268.1	87.7	43.1	2.0348
4631426J05Rik	NM_029935	79.4	39.1	2.03069
1200016E24Rik	XM_489305	5071.2	2500.5	2.02807
Emp2	NM_007929.1	471.9	232.7	2.02793
Rp2h	NM_133669	174.7	86.2	2.02668
Psmb8	NM_010724	920.6	454.3	2.02641
2510015F01Rik	XM_354801.1	217.8	107.5	2.02605
AA407930	NM_133349.2	494.7	244.3	2.02497
Ifitm1	NM_026820.2	711.4	351.6	2.02332
9230112O05Rik	NM_173347.2	147.6	73	2.02192
Rassf1	NM_019713.2	450.2	222.7	2.02155
Pltp	NM_011125.1	535.8	265.1	2.02112
Pecam1	NM_008816	508	251.4	2.02068
Nt5e	NM_011851.2	227.3	112.5	2.02044
Ifi47	NM_008330.1	751.1	372	2.01909
2510009E07Rik	NM_001001881	750.6	372.2	2.01666
AI642036	XM_109767.2	109.5	54.3	2.01657
Set7	NM_080793	231.9	115	2.01652
Tpm3	NM_022314	1040.5	516	2.01647
4930579E17Rik	NM_178629	107.2	53.2	2.01504
	AK087461.1	67.5	33.5	2.01493
Zfyve16	NM_173392.1	57.8	28.7	2.01394
6230425C21Rik	AK012678	455.2	226.6	2.00883
Gas2l3	XM_137276	122.3	60.9	2.00821
Samhd1	NM_018851.2	322	160.6	2.00498
Cri1	NM_025613.1	54.5	27.2	2.00368
Psap	NM_011179	7878	3932.7	2.0032
Il1a	NM_010554	63.5	31.7	2.00315
G630055P03Rik	NM_177150.1	168.6	84.3	2
Dhrs6	NM_027208.1	719	1440.1	0.499271
1110007M04Rik	NM_026742.1	619.2	1240.4	0.499194
Ddx6	NM_007841.2	552.3	1106.6	0.499096
2310067G05Rik	XM_147277.1	253.6	508.9	0.49833
Slc1a2	NM_011393	580.6	1165.9	0.497984
4833416J08Rik		55.6	111.8	0.497317
E130319B15Rik	NM_178663	44.2	88.9	0.497188
5830406C17Rik	XM_488874	79.3	159.5	0.497179
5730466C23Rik	NM_027469.1	48.1	96.9	0.496388
Csnk2a1	NM_007788.2	36.5	73.6	0.495924
2010005J08Rik	NM_178623.2	77	155.3	0.495815
0710001D07Rik		118.1	238.2	0.495802
Slc29a1	NM_022880.1	529.2	1067.4	0.495784
Pard6a	NM_019695	52.2	105.3	0.495726
6030411K04Rik	XM_486150	37.7	76.1	0.495401
2610302F08Rik	AK011964	30.9	62.4	0.495192
9030612M13Rik	NM_172458.2	215.5	435.2	0.495175
LOC386068	XM_359052.1	130.4	263.4	0.495065
2810455D13Rik		47.4	95.8	0.494781
Pdk2	NM_133667.1	255.6	516.7	0.494678
Saa4	NM_011316.2	1637.4	3312.1	0.494369
Abca6	NM_147218.1	56	113.3	0.494263
Tef	NM_017376.2	2107.6	4267.6	0.493861
C430014D17Rik	NM_139304.1	57.9	117.3	0.493606
LOC243823	XM_145307.2	133.9	271.3	0.49355
Kifc2	NM_010630.1	36.1	73.2	0.493169
Dlgh3	NM_016747.1	258.8	524.9	0.493046
Knsl5	AK076271	137.5	278.9	0.493008
6430590A07Rik	AK078307	49.2	99.8	0.492986
4930527B16Rik	XM_147531.1	38.5	78.1	0.492958
F11	NM_028066.1	98.9	200.7	0.492775
1700008N02Rik		87	176.6	0.492639
Eef2k	NM_007908	38.3	77.8	0.492288
Krt1-10	NM_010660.1	63.8	129.6	0.492284
A630034E16Rik	AK041749	31.6	64.2	0.492212
1600021C16Rik	NM_028059.1	37.6	76.4	0.492147
Ttc7b	XM_127105.4	296.3	602.2	0.492029
4732496O19Rik	NM_133853.1	32.5	66.1	0.491679
C730043O17		415.6	845.3	0.49166
D5Bwg0860e	NM_027530.2	57	116	0.491379
BC027174	NM_172260.1	36.2	73.7	0.49118
Cklfsf8	NM_027294.1	935	1903.8	0.491123
		35.1	71.5	0.490909
4732466D17Rik	XM_129420.4	679.9	1385.3	0.490796
Cbx2	NM_007623.2	51.7	105.4	0.490512
Dgka	NM_016811.2	53.4	109	0.489908
2510022D24Rik		97.4	199	0.489447
Csnk2a1-rs3	AK031617	156.7	320.2	0.489382
9030617O03Rik	NM_145448	40.6	83	0.489157
C130071E11Rik	AK081716	32.1	65.7	0.488584
Klf15	NM_023184.2	390.6	799.5	0.488555
Adcy9	NM_009624.1	263.7	540.3	0.488062
Car14	NM_011797.1	366.2	750.9	0.487681
Pcsk4	NM_008793.1	138.5	284.4	0.48699
Rdh11	NM_021557	2046.1	4201.8	0.486958
Pfdn2	NM_011070.2	862	1770.4	0.486896
Slc37a4	NM_008063.1	762.3	1565.7	0.486875
Bcl2l12	NM_029410.1	32.1	66	0.486364
Fgfrl1	NM_054071.1	193.8	398.5	0.486324
Hpd	NM_008277.1	7967.3	16409.2	0.485539
Pte2a	NM_134246.2	88.5	182.3	0.485464
Hagh	NM_024284.1	2540.5	5234.5	0.485338
1810020D17Rik	NM_183251.2	760.8	1567.6	0.485328
Tle2	NM_019725.1	77.4	159.5	0.485266
1500041I23Rik	XM_356257.1	75.3	155.2	0.48518
E130013N09Rik	XM_488964	115.9	239	0.484937
LOC235860	XM_142431.1	122.7	253.3	0.484406
2810021G02Rik		144.1	297.6	0.484207
C730014E05Rik	NM_177051.2	29.7	61.4	0.483713
B130033B12Rik		29.7	61.4	0.483713
Adh5	NM_007410.2	49.5	102.4	0.483398
Amhr2	NM_144547.1	34.7	71.8	0.483287
1300015B04Rik	XM_129157.2	140.5	290.8	0.48315
Bai2	NM_173071.1	80.7	167.2	0.482656
Msh3	NM_010829.1	27.8	57.6	0.482639
4921531D08Rik	AK076602	54.3	112.6	0.482238
Nr5a2	NM_030676.1	942.8	1958.4	0.481413
Haao	BC012872	2595.9	5393.7	0.481284
Bach2	NM_007521.2	81.3	169.1	0.480781
1110020G09Rik	XM_127934.4	50.1	104.3	0.480345
Olfr1380	NM_207573.1	31.7	66	0.480303
LOC380712	XM_354627.1	382.2	796.7	0.479729
4933439F18Rik	AK017120	30.1	62.8	0.479299
Lin7a	XM_193582.3	44.1	92.1	0.478827
9130422G05Rik	NM_025782	152	317.6	0.478589
Rdh7	NM_017473.1	4436.1	9272.1	0.478435
Gls2	XM_125928	3005.2	6288.8	0.477865
Cpsf6		45.3	94.9	0.477345
Zfml	BC076615	31.6	66.2	0.477341
2900026A02Rik	NM_172884.1	34.6	72.5	0.477241
Fzd8	NM_008058.1	61.7	129.4	0.476816
Ga-pending	XM_125928.4	276.7	581	0.476248
LOC381527	XM_355488.1	68.7	144.3	0.476091
2400009B11Rik	NM_025886	132.3	278.1	0.475728
Ppp2r5e	NM_012024.1	92.1	193.6	0.475723
BC048082	NM_177922.2	33.1	69.6	0.475575
Fxyd1	NM_052992.1	57.2	120.3	0.475478
D030006P03Rik	AK083427	28	58.9	0.475382
4833426J09Rik		555.3	1168.2	0.475347
Cntf	NM_053007.1	142.7	300.4	0.475033
Fxr2h	NM_011814.1	33.1	69.7	0.474892
Rbks	NM_153196.1	208	438.3	0.474561
Eva1	NM_007962.2	644.2	1357.5	0.474549
Asb2	NM_023049.1	68.8	145	0.474483
Zfp276	NM_020497.1	140.7	296.9	0.473897
Np15	NM_019435.2	52.6	111.3	0.472597
Ankhd1		76.8	162.6	0.472325
Fbxo30	XM_125493	77.7	164.7	0.471767
2400009B11Rik	NM_025886.2	66.6	141.2	0.471671
Mospd3	NM_030037.1	192.7	408.8	0.47138
BC023823	NM_153566.1	108.7	230.6	0.471379
Slc25a22	NM_026646.1	1225.5	2600.1	0.471328
5033421J10Rik		37.3	79.2	0.47096
Tuba4	NM_009447.2	38.9	82.7	0.470375
Peo1	NM_153796	37.1	78.9	0.470215
Pxmp2	NM_008993	2025.3	4307.3	0.470202
Slc29a1	BC004828	113.3	241	0.470124
Mast3	NM_199308.1	682.6	1452.7	0.469884
E430023L22Rik	AK088688	33.2	70.7	0.46959
Dnajb9	NM_013760	330.2	703.8	0.469167
1500031N24Rik	XM_128010.4	476.9	1016.8	0.46902
Hgd	AK050193	362.5	772.9	0.469013
Alas2	NM_009653.1	1589.7	3392.4	0.468606
2810408E11Rik	NM_029582	40.3	86	0.468605
Ttc14	NM_025978.2	133.6	285.6	0.467787
Gorasp1	NM_028976.1	64.8	138.6	0.467532
Crygn	NM_153076	28	59.9	0.467446
4833424P18Rik	NM_029017	325.7	697.5	0.466953
3021401C12Rik		148.8	319	0.466458
AI854408	NM_172538.2	30	64.4	0.465839
Ak4	NM_009647.1	268.4	576.3	0.46573
Zfp523	NM_172617.1	38	81.6	0.465686
Cyp2j9	NM_028979.1	117.9	253.2	0.46564
1810009N02Rik	NM_026939.1	243.9	524	0.465458
B930008K04Rik	NM_175446.2	150.6	323.7	0.465246
Pcsk4	NM_008793.1	57.6	123.9	0.464891
Etnk2	NM_175443	30.4	65.4	0.464832
5730478M09Rik	XM_358792.1	123.8	266.4	0.464715
AI849156	NM_183142.1	50	107.6	0.464684
Tob2	NM_020507.2	265.1	570.8	0.464436
Upk3b	NM_175309.3	28.6	61.6	0.464286
C430014B12Rik		37.6	81	0.464198
D030010H02Rik	AK083433	51	110	0.463636
Pdk1	NM_172665.1	712.8	1538.3	0.463369
A230075M04Rik		74.7	161.3	0.463112
BC024868	NM_199149	59	127.5	0.462745
Lss	NM_146006	491.2	1061.9	0.462567
Fahd1	NM_023480.1	1083.3	2342	0.462553
Cstf3	NM_145529.1	290.6	629.7	0.46149
A930037O16Rik		157.7	341.8	0.461381
Car1	NM_009799.1	105.4	228.5	0.461269
Acy1	NM_025371.1	48.2	104.5	0.461244
Foxb1	NM_022378	28.6	62.1	0.460548
2900064A13Rik	NM_133749	97.5	212	0.459906
Dexi	NM_021428.3	149.3	324.7	0.459809
2700038N03Rik	NM_027356.1	52.5	114.2	0.45972
C86987	XM_127523.2	32.5	70.7	0.459689
Adck5	NM_172960.1	151.3	329.2	0.459599
Prkaa2	XM_131633	36	78.5	0.458599
4632428M11Rik	NM_028730.2	129.7	282.9	0.458466
Hes6	NM_019479.2	3727.9	8132.1	0.458418
0610007P08Rik	XM_484269	58.9	128.6	0.458009
AW491445	NM_134154.1	1188.4	2597.7	0.457482
Slc38a3	NM_023805.2	3025.6	6616.5	0.457281
D0H4S114	NM_053078.3	309	675.8	0.457236
4631409F12Rik	AK028452	39.7	86.9	0.456847
Akap9	NM_194462.1	37.3	81.7	0.456548
Acy1	NM_025371.1	219.5	481	0.456341
BC026432	NM_146202.1	100.6	220.5	0.456236
Extl1	NM_019578	214.9	471.1	0.456166
E130302P19Rik	AK087474	103.4	226.9	0.455707
Krt2-6b	NM_010669.1	27.4	60.2	0.45515
LOC381534	XM_355502.1	29.2	64.2	0.454829
D7Ertd743e	NM_153525.2	82.5	181.4	0.454796
Edg8	NM_053190.1	27.9	61.4	0.454397
6820449I09Rik	NM_177128.2	132.5	291.6	0.45439
Sca1	NM_009124.2	280.5	617.4	0.454325
9030625G08Rik	NM_025780	82	180.5	0.454294
Rad51l3	NM_011235.2	51.4	113.2	0.454064
Cc1	XM_123485.1	40.1	88.5	0.453107
2310002J21Rik		211.4	467.6	0.452096
Otub2	NM_026580.1	31.1	68.8	0.452035
BB114266	NM_172763.1	49.8	110.2	0.451906
6430543K15Rik		35.2	77.9	0.451861
1810014B01Rik		36.9	81.7	0.451652
C330020G15Rik		36.7	81.3	0.451415
Tmem25	NM_027865.1	360.9	800.4	0.4509
C920004H05Rik	AK083320	32	71	0.450704
D130043K22Rik	XM_111397.3	140.3	311.3	0.450691
Fasn	NM_007988.1	5468.5	12136.6	0.450579
Phf7	NM_027949.1	63.8	141.6	0.450565
E2f2	NM_177733.2	72.4	160.7	0.450529
Fgf1	NM_010197.2	263.3	584.9	0.450162
Zfp354a	NM_009329.2	57.5	128	0.449219
5730577G12Rik	AK030766	126.8	282.3	0.449168
Anks1	NM_181413.2	73.2	163	0.44908
Ppp1r15b	NM_133819	87.9	195.8	0.448927
Igfals	NM_008340.2	1799.4	4018.4	0.44779
Es22	NM_133660.1	1126.8	2522.2	0.446753
5730460G06Rik		30.4	68.1	0.446402
LOC380997	XM_354908.1	57.5	129	0.445736
Slc4a1	NM_011403.1	56.1	125.9	0.445592
9530082I15Rik	AK035657	31.6	71	0.44507
Leng1	NM_027203.2	49.2	110.7	0.444444
Hsd17b7	AK077914	33.5	75.4	0.444297
Tpd52l1	NM_009413.1	58.2	131.1	0.443936
Il1rap	NM_008364.1	1594.2	3601.1	0.442698
6330400D04		91	205.6	0.442607
Shmt1	NM_009171	1139.1	2575	0.442369
Ceacam1	NM_011926.1	206	468.3	0.439889
B130016H12Rik		102.8	233.7	0.43988
BC024659	XM_488673	73.5	167.2	0.439593
Sbk	NM_145587.1	485.5	1106.5	0.438771
Rab22a	NM_024436.1	63.2	144.2	0.43828
3222402P14Rik	XM_135153.4	30.5	69.7	0.43759
Zfp128	NM_153802	29.4	67.2	0.4375
D430045C01Rik	AK085153	35.3	80.7	0.437423
7420701I03Rik		56.8	130.2	0.436252
Acy1	NM_025371.1	255.3	585.8	0.435814
A530050D06Rik	XM_203596	886.9	2035.2	0.43578
Cat	NM_009804	124.5	286.2	0.43501
1810005K13Rik		147.5	339.4	0.43459
BC023892	XM_135029.3	70	161.3	0.433974
BC031575	XM_484525	39.6	91.6	0.432314
Tardbp	NM_145556.2	62.8	145.3	0.432209
1700080G11Rik		195.9	453.7	0.431783
Stard4	NM_133774.2	1472.7	3412.6	0.431548
Fbxo3	NM_020593.2	36.1	83.7	0.431302
2210420L05Rik		413.6	959.2	0.431193
Lce-pending	AK087440	138.8	321.9	0.43119
Ptk6	NM_009184.1	33.5	77.7	0.431145
Stau2	NM_025303	57.9	134.3	0.431124
Paqr9	NM_198414.1	1062.4	2465.2	0.430959
4632419F02Rik	AK028526	46.8	108.6	0.430939
Sms	NM_009214.2	34.1	79.2	0.430556
E430033B07Rik	AK088947	199.2	462.8	0.430424
Map17	NM_026018.1	43.7	101.6	0.430118
D930048J18Rik	AK086738	25.5	59.3	0.430017
B230342M21Rik	NM_133898.1	579.3	1347.9	0.42978
Gbe1	AK050423	32.6	75.9	0.429513
D830044I01Rik	AK052922	34.1	79.4	0.429471
Abca8a	NM_153145.1	843.3	1964.2	0.429335
Hmg20a	AK039222	30.9	72	0.429167
2810439F02Rik	AK080904	54	125.9	0.428912
BC024386		1476.8	3452.8	0.427711
Car11	NM_009800.2	38.7	90.6	0.427152
D630035N04Rik	AK085505	948.3	2220.2	0.427124
9230112E08Rik	NM_177264	45.4	106.3	0.427093
LOC381277	XM_355219.1	35	82	0.426829
A730016A17		32.7	76.7	0.426336
Ulk1	NM_009469.3	379.7	891	0.42615
1700020C11Rik	NM_026443.2	92.2	216.4	0.426063
A630084C02Rik	AK042344	25	58.7	0.425894
E130106K10	XM_136506.3	113.6	267.1	0.425309
2010001J22Rik	XM_128172.4	191.4	450.1	0.425239
9430088D19Rik		135.6	319.5	0.424413
3110057O12Rik	NM_026622.1	71.1	167.8	0.423719
Il1rap	NM_134103.1	613.2	1447.5	0.423627
Prodh	NM_011172.1	756.7	1787.3	0.423376
Paox	NM_153783.2	327.4	773.4	0.423326
Ppargc1b	NM_133249	233.4	551.6	0.423133
	AK002608.1	1896.2	4489.7	0.422344
Ng23	XM_358322.1	24.6	58.3	0.421955
BC037135	NM_173763.2	140.6	334	0.420958
AV071179	NM_031180.1	282.5	671.5	0.4207
Dbp	NM_016974.1	1682.3	4001.8	0.420386
Mup3	NM_010845	15483.3	36837.9	0.420309
Cyp4a12	NM_172306.1	830.6	1976.7	0.420195
Bat9	NM_198886.2	92.5	220.3	0.419882
Zap70	NM_009539.2	290.9	693.9	0.419225
2610009I02Rik	NM_028115	43	103.6	0.415058
Ccbl1	NM_172404.2	835.2	2013.1	0.414883
Smarca2	NM_011416	48.7	117.4	0.414821
Sult5a1	NM_020564.1	26.4	63.7	0.414443
Per3	NM_011067	180.3	435.3	0.414197
2210039O17Rik	AK019056	106.2	256.5	0.414035
Harp	NM_028085.1	83.4	202	0.412871
0610031G08Rik		221.9	537.5	0.412837
Pank1	NM_023792.1	337.3	817.5	0.412599
3110045D15Rik	AK014178	43.2	104.8	0.412214
AU018778	NM_144930.1	1190.6	2899.1	0.410679
Sntg2	NM_172951.1	207.1	505.8	0.40945
Onecut1	NM_008262	44.9	109.7	0.409298
Mpst	NM_138670.1	48.2	117.8	0.409168
B430005K18Rik	AK046551	169.6	415.3	0.408379
	AK012972.1	31.5	77.3	0.407503
BC016198	NM_203507.1	63.8	156.6	0.407407
Pqlc2	NM_145384	30.3	74.4	0.407258
A930034L06Rik	NM_175692.2	28.3	69.6	0.406609
9430098F02Rik		29.7	73.1	0.406293
LOC383125	XM_356890.1	135.9	334.6	0.406157
Accn5	NM_021370.1	399.2	983.8	0.405774
Dpm1	NM_010072.2	230	567.1	0.405572
MGC25972	NM_177406.2	6156.3	15191.8	0.405238
Elovl6	NM_130450.1	680	1681.3	0.404449
Sned1	NM_172463.3	339.1	839.5	0.403931
C730048C13Rik	NM_177002.2	454.9	1126.9	0.403674
Slc43a1	XM_130259.4	32.4	80.5	0.402484
Timm10	NM_013896	37.2	92.6	0.401728
B230105J10	XM_484075	33.3	83	0.401205
Zfp445	NM_173364.3	39.7	99	0.40101
BC039632	XM_284356.2	89.6	223.7	0.400536
9430088B20Rik		82.5	206.1	0.400291
A930014K01Rik	NM_175537.2	24	60	0.4
C230004L04		24	60	0.4
C730048C13Rik	NM_177002.2	50.7	126.9	0.399527
Caln1	NM_021371.1	59	147.7	0.399458
2610301B20Rik	NM_026005.2	29.4	73.8	0.398374
Hyal1	NM_008317.2	225.4	568.4	0.396552
Grem2	NM_011825.1	60.4	152.5	0.396066
2210401K01Rik		129.5	327	0.396024
2610009I02Rik	NM_028115.2	108.2	273.4	0.395757
Enpep	NM_007934.1	57.9	146.4	0.395492
C730018L13Rik	AK050126	1206.1	3055.6	0.394718
1300010A20Rik	NM_146173.1	48.3	122.4	0.394608
BC066107	NM_207245.1	23.7	60.1	0.394343
Lrpprc	NM_028233.1	84.1	213.3	0.39428
Wbscr14	NM_021455.2	607.8	1543.7	0.393729
2310035P21Rik		124.2	315.8	0.393287
Prkcdbp	NM_028444.1	105	267.4	0.39267
Abcb10	NM_019552.1	114.1	290.7	0.392501
0610012D14Rik	NM_026690.1	147.2	375.6	0.391906
Hook3	XM_134108.3	164.7	420.6	0.391583
Got1	NM_010324.1	594.5	1519.4	0.391273
Kcnk5	NM_021542.2	77.3	198.4	0.389617
Ppargc1a	NM_008904.1	79.2	203.6	0.388998
Ppm1l	NM_178726.1	78.5	202.2	0.388229
Afmid	NM_027827.2	1081.7	2788.5	0.387915
Terf2	AK048767	71.8	185.4	0.387271
Npr2	NM_173788.2	205.5	531.8	0.386423
Srd5a1	NM_175283.2	173.7	450.4	0.385657
D130067I07Rik	AK051715	28.8	75.2	0.382979
Thea	NM_025590.3	187.2	489.1	0.382744
E130106K10Rik	XM_136506	143.1	374.9	0.381702
A930029B02Rik	NM_178779.2	415.1	1087.7	0.381631
A330081F11Rik	AK039667	120.4	315.5	0.381616
LOC386288	XM_359160.1	28.3	74.2	0.381402
Hes6	NM_019479.2	142.9	375	0.381067
Sucnr1	NM_032400.1	375.3	985.8	0.380706
Onecut1	NM_008262.2	24.1	63.4	0.380126
1300007L22Rik	NM_027917.1	466.8	1228.7	0.379914
4930528F23Rik	XM_128478.2	214.5	565.8	0.379109
B930075F07		191.9	507	0.378501
Car14	AK009805	42.5	112.3	0.378451
D1Bwg0212e	NM_028043.2	56.6	150	0.377333
2010305C02Rik	NM_027249	463.1	1228.3	0.377025
C530044G15Rik	AK083075	75	199	0.376884
Acly	NM_134037.2	3891.1	10354	0.375806
E430016L07Rik		35.5	94.5	0.375661
5730414N17Rik		95.6	254.9	0.375049
Cyp4f14	NM_022434.1	3116.9	8325.3	0.374389
BC005682	NM_033562.2	39.5	105.6	0.374053
Homer2	XM_133550.4	407.6	1089.9	0.373979
A930018M24Rik	NM_199318	61	163.2	0.373775
4933437K13Rik	AK086865	48.4	129.8	0.372881
6230415M23Rik		96.6	260	0.371538
BC020535	NM_145536.1	94.7	256	0.369922
Timm17b	NM_011591	68	183.9	0.369766
2310001H17Rik	XM_489155	314.2	851.4	0.369039
1810046K07Rik	XM_134800.2	57.7	156.5	0.36869
AA407809	NM_030724.1	50.8	137.8	0.36865
0610031O16Rik		62.4	169.3	0.368576
Smo	NM_176996.3	30.8	83.7	0.367981
A530030B07Rik	AK040847	26.1	71.1	0.367089
Prok1	XM_487748	158.2	431.9	0.366288
CRAD-L	NM_145424	1167.6	3193.7	0.365595
Zfp297b	NM_027947.1	83.6	229.1	0.364906
F7	NM_010172.1	336.1	922.1	0.364494
2900060F21Rik	AK013732	50.9	139.7	0.364352
Reck	NM_016678	32.2	88.6	0.363431
Srprb	NM_009275.2	30.3	83.4	0.363309
Cyp17a1	NM_007809.2	380	1048.4	0.362457
2610009I02Rik	NM_028115.2	89	246.1	0.361642
Ccrn4l	NM_009834.1	114	315.5	0.361331
Adpn	NM_054088	142.8	395.6	0.360971
Ppm1l	NM_178726	131.6	364.7	0.360845
Afmid	NM_027827.2	180.1	502	0.358765
2310007J06Rik		28.1	78.5	0.357962
4931413A09Rik	XM_147407.2	43.5	122.1	0.356265
LOC383215	XM_356927.1	328.3	922	0.356074
Fthfd	AK007822	86.2	242.3	0.355757
Ppm1l	NM_178726.1	42.8	120.9	0.354012
LOC385673	XM_358902.1	21.3	60.2	0.353821
Cmah	NM_007717.1	80.9	228.8	0.353584
	XM_129087.4	578.5	1637.2	0.353347
D11Ertd636e	NM_029794.1	234.3	665.3	0.352172
Slc25a10	NM_013770	67.4	191.4	0.352142
Afmid	NM_027827.2	357.4	1016.3	0.351668
Avpr1a	NM_016847.2	66.7	190.5	0.350131
9030616G12Rik		54.8	157.8	0.347275
Narfl	NM_026238.2	21.4	61.7	0.34684
9030622O22Rik		34.4	99.2	0.346774
Pxmp2	NM_008993.1	944.2	2728.8	0.346013
2010001J22Rik	XM_128172.4	58.8	170.2	0.345476
Sds	NM_145565.1	1239.6	3588.9	0.345398
Abcc6	NM_018795.1	61.5	178.4	0.344731
1110006G14Rik	XM_355930.1	53.9	156.9	0.343531
Ell3	NM_145973.2	97.3	284.1	0.342485
Arl8	NM_029466.2	31.8	93.2	0.341202
Ccrn4l	NM_009834.1	108.4	318.4	0.340452
9530025L08Rik		66.4	195.2	0.340164
Afmid	NM_027827.2	183.6	540.6	0.339623
Mid1ip1	NM_026524.2	746.1	2198	0.339445
LOC218276	XM_122579.3	454.3	1348.5	0.336893
Gnpda1	XM_124695.2	47.3	140.5	0.336655
Mcm10	NM_027290.1	184	547.1	0.336319
2610110G12Rik	NM_028476.2	19.9	59.2	0.336149
C730048C13Rik	NM_177002.2	178.6	533	0.335084
9130221J18Rik		264.1	791.9	0.333502
Pklr	NM_013631.1	317.2	951.3	0.333438
Clcn2	XM_147240.1	116.7	350	0.333429
9030618K22Rik		382	1145.7	0.333421
Cmah	NM_007717.1	43.8	131.4	0.333333
9530091C08Rik	NM_177159	20.7	62.1	0.333333
LOC245892	XM_147335.2	77.2	231.9	0.332902
6330514A18Rik	NM_183152.1	30.3	91.4	0.33151
Mpv17l	NM_033564.1	26.4	79.8	0.330827
BC056929	NM_172928.1	163.9	497.9	0.329183
Sc5d	NM_172769	494.1	1501.7	0.329027
Pipox	NM_008952.1	478.8	1457.1	0.328598
Rad23b	AK084917	20.8	63.4	0.328076
Temt	NM_009349	9959.6	30411	0.3275
A230013K13Rik	AK038454	30.7	93.8	0.327292
Per2	NM_011066.1	248.4	759.4	0.3271
Acacb	NM_133904	449.6	1376.7	0.326578
Nudt7	NM_024437	1636.2	5014.2	0.326313
LOC383576	XM_357131.1	44.8	137.4	0.326055
A530020H22Rik	AK079944	236.6	730.9	0.32371
Egfr	NM_207655.1	54.6	168.7	0.323651
AI317395	NM_144821.2	226.8	705	0.321702
C730029A08Rik		409.3	1276.3	0.320693
LOC384348	XM_357593.1	119.9	375.7	0.319138
B130034H21Rik	AK045115	29	91.1	0.318332
E130014J05Rik	NM_145989.1	21.4	67.4	0.317507
Slc2a9	NM_145559.1	87.8	279	0.314695
Gnmt	AK082459	673.1	2142.4	0.31418
Zfp50	XM_127016.2	291.3	927.6	0.314036
Kif13b	XM_283218.2	25.6	81.6	0.313725
Fn3k	NM_022014.1	110	351.1	0.313301
4933432P15Rik	NM_175164.2	28.7	91.7	0.312977
Agxt2l1	NM_027907.1	525.9	1685.1	0.312088
Zfp395	NM_199029.1	42.1	134.9	0.312083
A930023F12Rik	AK044567	26.6	85.3	0.311841
Nox4	NM_015760.2	295.1	948.9	0.310992
Lin7a	XM_193582	275.2	885.7	0.310715
Sdro	NM_027301.3	91.1	293.5	0.310392
5730594E01Rik	AK077748	37.8	122.2	0.309329
Sds	NM_145565.1	759.8	2458.1	0.309101
Coxvib2	NM_183405.1	39.6	128.4	0.308411
Afmid	NM_027827.2	370.6	1206.4	0.307195
Polr3g	XM_283153	36.3	118.3	0.306847
9130422G05Rik	NM_025782.2	145.8	477.2	0.305532
Nfe2	NM_008685.2	29.3	95.9	0.305527
LOC385792	XM_358947.1	22.3	73	0.305479
D830041I17Rik	AK052921	44.5	145.9	0.305003
LOC385389	XM_358219.1	19.6	64.8	0.302469
Slc11a2	NM_008732.1	50.5	167.2	0.302033
1810033M07Rik	NM_026983.1	49.3	163.7	0.301161
AI481316	XM_148986.1	165.4	550.3	0.300563
Ddx6	NM_007841.2	17.9	60	0.298333
Slc25a25	NM_146118.2	281.3	943.1	0.298272
Scd1	NM_009127.2	9931.2	33740.7	0.294339
Fndc4	NM_022424.2	46.1	156.9	0.293818
Ar	NM_013476.2	57.9	199.3	0.290517
Slc22a7	NM_144856.1	139.1	481.1	0.289129
2810439F02Rik	NM_028341.1	635.7	2204.1	0.288417
Ppp1r3b	NM_177741	716.1	2513.9	0.284856
9530075P13Rik	AK035604	22	77.7	0.28314
Mpv17l	NM_033564.1	92.2	325.8	0.282996
Acas2	NM_019811.2	1972.3	7032.2	0.280467
9030617O03Rik	NM_145448.2	16.4	58.9	0.278438
Egfr	NM_007912.3	714	2564.6	0.278406
Spag4	NM_139151	71.1	255.7	0.27806
Pde6h	NM_023898	32.4	116.9	0.27716
Aacs	NM_030210.1	1213.5	4381.7	0.276947
LOC381806	XM_355806.1	477.3	1735.1	0.275085
C330008L01Rik	NM_175351	19	69.2	0.274566
Ppp1r3b	NM_177741.2	185.1	678.6	0.272767
9630019E01Rik		26.5	98.9	0.267947
Afmid	NM_027827.2	120.5	449.9	0.267837
D930010J01Rik	NM_134147.2	306.2	1156.3	0.26481
	AK052902.1	19.2	73.9	0.259811
1700051I12Rik	XM_181390.2	83.9	323.7	0.259191
Mpp4	NM_145143.1	19.7	76.5	0.257516
4833439F03Rik		30.8	120.6	0.25539
Spry4	NM_011898.2	46.9	184.9	0.253651
G430046L24Rik	AK089991	15.1	59.6	0.253356
Plg	AK040840	28.1	111.1	0.252925
Upp2	NM_029692.1	332.3	1319.6	0.251819
4833413G10Rik	XM_149575.1	22.5	89.4	0.251678
Mvd	NM_138656.1	103.9	420.8	0.246911
Egfr	NM_207655.1	870.5	3525.7	0.246901
Upp2	NM_029692.1	316.4	1292.4	0.244816
2810439F02Rik	NM_028341.1	674.1	2753.9	0.24478
BC024139	NM_198172	59.2	243.7	0.242922
G6pc	NM_008061.2	1405.4	5823	0.241353
LOC386294	XM_359162.1	72.6	303.5	0.239209
Cmah	NM_007717.1	37.2	156.3	0.238004
Ela1	NM_033612.1	274.4	1157.9	0.236981
Upp2	NM_029692.1	257.7	1114.6	0.231204
9030024J15Rik		848.9	3688	0.230179
LOC381770	XM_355767.1	55.9	246.7	0.226591
A330072B11Rik	AK039609	68.4	305.5	0.223895
A930036K24Rik		110.6	500.8	0.220847
Hsd3b2	NM_153193.2	14.9	69	0.215942
Gnat1	NM_008140.2	61.1	284.5	0.214763
1700001C19Rik	XM_128669	53.2	249.1	0.213569
LOC13909	NM_144511.1	163.8	768.3	0.213198
Lin7a	XM_193582.3	63.2	300.8	0.210106
BC024137		94.2	453.5	0.207718
Sdro	NM_027301.3	56	272.3	0.205656
A930016D02Rik	NM_176920.2	40.3	204.9	0.196681
Slc10a1	NM_011387.1	69.2	352.4	0.196368
A930016D02Rik	NM_176920.2	85.4	441	0.193651
2900016G23Rik	XM_147738.1	12.3	64.3	0.191291
Tmie	NM_146260.1	121.3	635.6	0.190843
1700012D01Rik		28.2	159	0.177358
Scnn1a	NM_011324.1	49.6	299.5	0.165609
Thrsp	AK050300	48.9	299.3	0.163381
Mmd2	NM_175217.3	180.4	1112.1	0.162216
5730512J02Rik	AK017766	28.5	175.9	0.162024
A630078J04Rik	AK042286	11	68.1	0.161527
B230342N21Rik	AK046118	16.1	101	0.159406
Col27a1	NM_025685	31.4	198.4	0.158266
B430114K07Rik	AK046591	18.1	116.5	0.155365
4930481A15Rik	XM_148889.4	11.8	76.6	0.154047
Chrna4	NM_015730.4	60.1	392.5	0.153121
1700018L02Rik		8.7	57.1	0.152364
		10	66.6	0.15015
Cyp7b1	NM_007825.1	729.3	5051.1	0.144384
1810059H22Rik		16.6	117.1	0.141759
1700001C19Rik	XM_128669.1	19	145.4	0.130674
4930513E20Rik	XM_149158.1	7.9	65.4	0.120795
Camk4	NM_009793	8.1	68	0.119118
Got2	NM_010325	23.7	204.5	0.115892
2810007J24Rik	NM_175250.3	913.6	7932.3	0.115175
Hsd3b2	NM_153193.2	134.2	1190.9	0.112688
LOC239727	XM_156408.2	88.7	803.9	0.110337
Nnmt	NM_010924.1	38.6	368.2	0.104834
Thrsp	NM_009381.2	573.7	5521	0.103912
Col27a1	NM_025685.2	14.3	142.9	0.10007
LOC241041	XM_136557.2	96.2	962.9	0.0999065
Hsd3b2	NM_153193.2	20.7	211.6	0.0978261
Mup2	NM_008647	1730.7	17843.1	0.0969955
Gna14	NM_008137.2	29.2	311	0.0938907
LOC384022	XM_357375.1	530	6096.4	0.0869366
1810073K19Rik	NM_183257.1	2334.8	27788.4	0.0840207
Sp4	NM_009239.1	4.9	59.2	0.0827703
AW320017		6.9	84.1	0.0820452
LOC236060	XM_135472.3	998.7	12951.5	0.0771108
Serpina4-ps1	XM_127122.2	18	317.9	0.0566216
LOC383483	XM_357088.1	21.4	417.8	0.0512207
0610008F07Rik	NM_197983.1	24.9	488.2	0.0510037
Mup4	NM_008648.1	161.8	3675	0.0440272
E430021N18Rik	NM_144796	67.8	1990.5	0.0340618
1810029C22Rik	XM_284386.2	5.7	168.8	0.0337678
Elovl3	NM_007703.1	6	282.8	0.0212164
LOC194586	XM_112088.2	30.7	3401.8	0.00902463
Slc38a5	NM_172479.1	0.8	90.4	0.00884956
Slco1a1	NM_013797	5.4	2162	0.00249769
Hsd3b5	NM_008295.1	2.6	6810.8	0.000381747
