# Supplementary material for: Requirement of RIZ1 for Cancer Prevention by Methyl-Balanced Diet
Source: PLoS One. 2008 Oct 13;3(10):e3390. doi: 10.1371/journal.pone.0003390 (PMC2559864; doi:10.1371/journal.pone.0003390)
Supplement: Table S4 — Genes regulated by RIZ1 knockout as revealed by DNA microarray analysis. The RNAs used for analysis were from wild type and knockout mice of four months of age on balanced diet. Data represent means of 2 animals per subgroup. Genes in bold were also regulated by diet. Only genes showing more than 2 fold changes are listed. (0.06 MB XLS) [file pone.0003390.s004.xls]

## Sheet: Sheet1
Supplementary Table S4
Symbol	Accesion	Wt	Ko	Wt/Ko
Dmbt1	NM_007769.1	201.9	17	11.8765
BC003277	NM_145402.2	2641.9	558.2	4.73289
LOC381534	XM_355502.1	69.2	17.1	4.04678
Socs3	NM_007707.2	332.5	86.5	3.84393
Nrp	AK030358	561.7	146.9	3.82369
Gadd45g	NM_011817.1	938.2	264.6	3.54573
Serpina9	NM_027997	76.6	22.3	3.43498
Socs2	NM_007706.1	524	154.2	3.39818
Chk	AK014174	64.1	19.1	3.35602
2700060E02Rik	NM_026528.1	59.2	18.1	3.27072
2900064B18Rik		253	80.4	3.14677
2310035P21Rik		132.4	44.8	2.95536
LOC383125	XM_356890.1	117.8	40.1	2.93766
Idb2	AK013239	1688.5	619.7	2.72471
Nxf1	AK086527	56.9	20.9	2.72249
Hnrpk	NM_025279.1	109.6	40.7	2.69287
9530029F08Rik		61.5	23	2.67391
D830014E11Rik	NM_177251.2	67.3	25.7	2.61868
Elovl3	NM_007703.1	418.8	160.5	2.60935
Rutbc2	NM_172718.1	94	37.4	2.51337
2810405K07Rik	NM_028141	127.4	52	2.45
B230314M03Rik	NM_001033800.1	71.6	29.6	2.41892
4930588K23Rik	NM_001033809.1	65.4	27.3	2.3956
Cited2	NM_010828.1	76.4	31.9	2.39498
LOC239727	XM_156408.2	929.1	390.8	2.37743
Insig2	NM_178082.2	213	89.6	2.37723
Sox9	NM_011448	232.5	99.9	2.32733
Fmn2	NM_019445.1	76.7	33	2.32424
1110067D22Rik	NM_173752.1	73.6	31.9	2.30721
Tgfb1i4	NM_009366.1	170.5	74.5	2.28859
LOC383483	XM_357088.1	257.8	112.9	2.28344
	AK041123.1	65.2	29.1	2.24055
Acaca	NM_133360.1	60.5	27.1	2.23247
Ugt1a6	NM_145079	287.4	128.9	2.22964
Rnf125	NM_026301.1	466.1	214.2	2.176
Ugt1a6	NM_145079	66.7	30.7	2.17264
B930007L02Rik	NM_001015507.1	64	30.5	2.09836
2810411C16Rik	AK013079	134.3	64.2	2.0919
Gjb2	NM_008125.2	61.5	29.4	2.09184
Bcl6	NM_009744.2	806.9	386	2.09041
Slc25a30	NM_026232.1	60.1	29.3	2.05119
5033430I15Rik	XM_127301.2	95.4	46.6	2.04721
Hrg	NM_053176.1	290.4	142.3	2.04076
Rasl11b	XM_355606	156.3	77.4	2.01938
Insig2	NM_133748.1	885.5	441.4	2.00612
9530025L08Rik		68.1	136.3	0.499633
LOC329554	XM_287194.1	34.3	69.3	0.494949
1500041J02Rik	NM_026424.2	279.2	568.8	0.490858
Pte2a	NM_134246.2	258.7	534.5	0.484004
2310067E08Rik	NM_028013.1	39.5	81.9	0.482295
LOC333621	XM_289715.2	28	58.7	0.477002
Upp2	NM_029692.1	1065.5	2251	0.473345
8430436L14Rik	XM_355454	37.5	79.4	0.472292
8430403J19Rik	AK033358	155.4	331.7	0.468496
Fthfsdc1	NM_172308.2	28.6	61.1	0.468085
G0s2	NM_008059.1	980.7	2115.3	0.463622
Kcnk5	NM_021542.2	171.2	372.3	0.459844
Upp2	NM_029692.1	931.6	2031.9	0.458487
Ren1	NM_031192	209.2	480.6	0.435289
1810011O10Rik	NM_026931.1	34.8	80.1	0.434457
LOC380906	XM_354819.1	30.6	71	0.430986
1700018O18Rik	XM_131683.2	2779.9	6491.1	0.428263
Bhlhb9	NM_198161.1	39.8	93	0.427957
Per1	NM_011065.2	89.3	208.7	0.427887
BC016495	NM_145497.1	45.3	108.3	0.418283
Sirt1	NM_019812.1	23.2	55.8	0.415771
Hrasls3	NM_139269.1	24	58.9	0.40747
6430406H24Rik	AK032164	26.7	65.8	0.405775
4833416J08Rik		24.7	61.7	0.400324
Abcc4	XM_139262.2	35.6	89.1	0.399551
LOC194586	XM_112088.2	426.6	1077.6	0.39588
2310011C19Rik		29.7	75.3	0.394422
Alas1	NM_020559.1	8787.3	22428.4	0.391793
Nrg4	NM_032002.1	41.4	105.7	0.391675
Igsf10		30.3	78.2	0.387468
LOC241901	XM_143135.3	100.5	263	0.382129
Cyp4a14	NM_007822.1	3523.7	9313.8	0.378331
Gdf15	NM_011819.1	77.6	212.9	0.36449
Thrsp	NM_009381.2	3997	11092.6	0.36033
Igl-V1	XM_148393.1	47.9	133.3	0.35934
Ibrdc3	XM_204030	22.7	64	0.354687
Pfkfb3	NM_133232.1	75.2	213.4	0.35239
Lpin1	NM_015763	251.3	727.1	0.34562
9530051K01Rik	XM_485965	172.8	503.2	0.343402
1110028A07Rik	NM_026808.1	21.9	63.9	0.342723
Cd79b	NM_008339.1	19.6	57.7	0.339688
Nrg4	NM_032002	68.7	212.9	0.322687
Tmc7	NM_172476.2	24.1	78.3	0.307791
Usp2	NM_198091.1	188.5	655.8	0.287435
LOC229599	XM_131070.3	19.3	74.5	0.25906
Usp2	NM_198091.1	26	102.1	0.254652
Cyp7a1	NM_007824.2	1659.4	6611.9	0.250972
Ctgf	NM_010217	12.3	56.4	0.218085
Ccrn4l	NM_009834.1	130.6	664.3	0.196598
Ccrn4l	NM_009834.1	26.1	159.4	0.163739
Jun	NM_010591.1	53.4	333.1	0.160312
1600032L17Rik	XM_127272	25.1	218.5	0.114874
1110005F07Rik	NM_025383	46.8	449.2	0.104185
Egr1	NM_007913.2	216.4	2368.3	0.0913736
Fos	NM_010234.2	1.1	95	0.0115789
